# Supplementary material for: Little evidence for land-use filters on intraspecific trait variation in three arthropod groups
Source: Copernicus journal article supplement (doi:10.5194/we-23-35-2023), 2023-03-27

Figure S2  
Principle Component Analysis  
(PCA) of relative morphological  
traits

Large dungbeetles  
*Anoplotrupes stercorosus*  
Eigenvalue 0.002

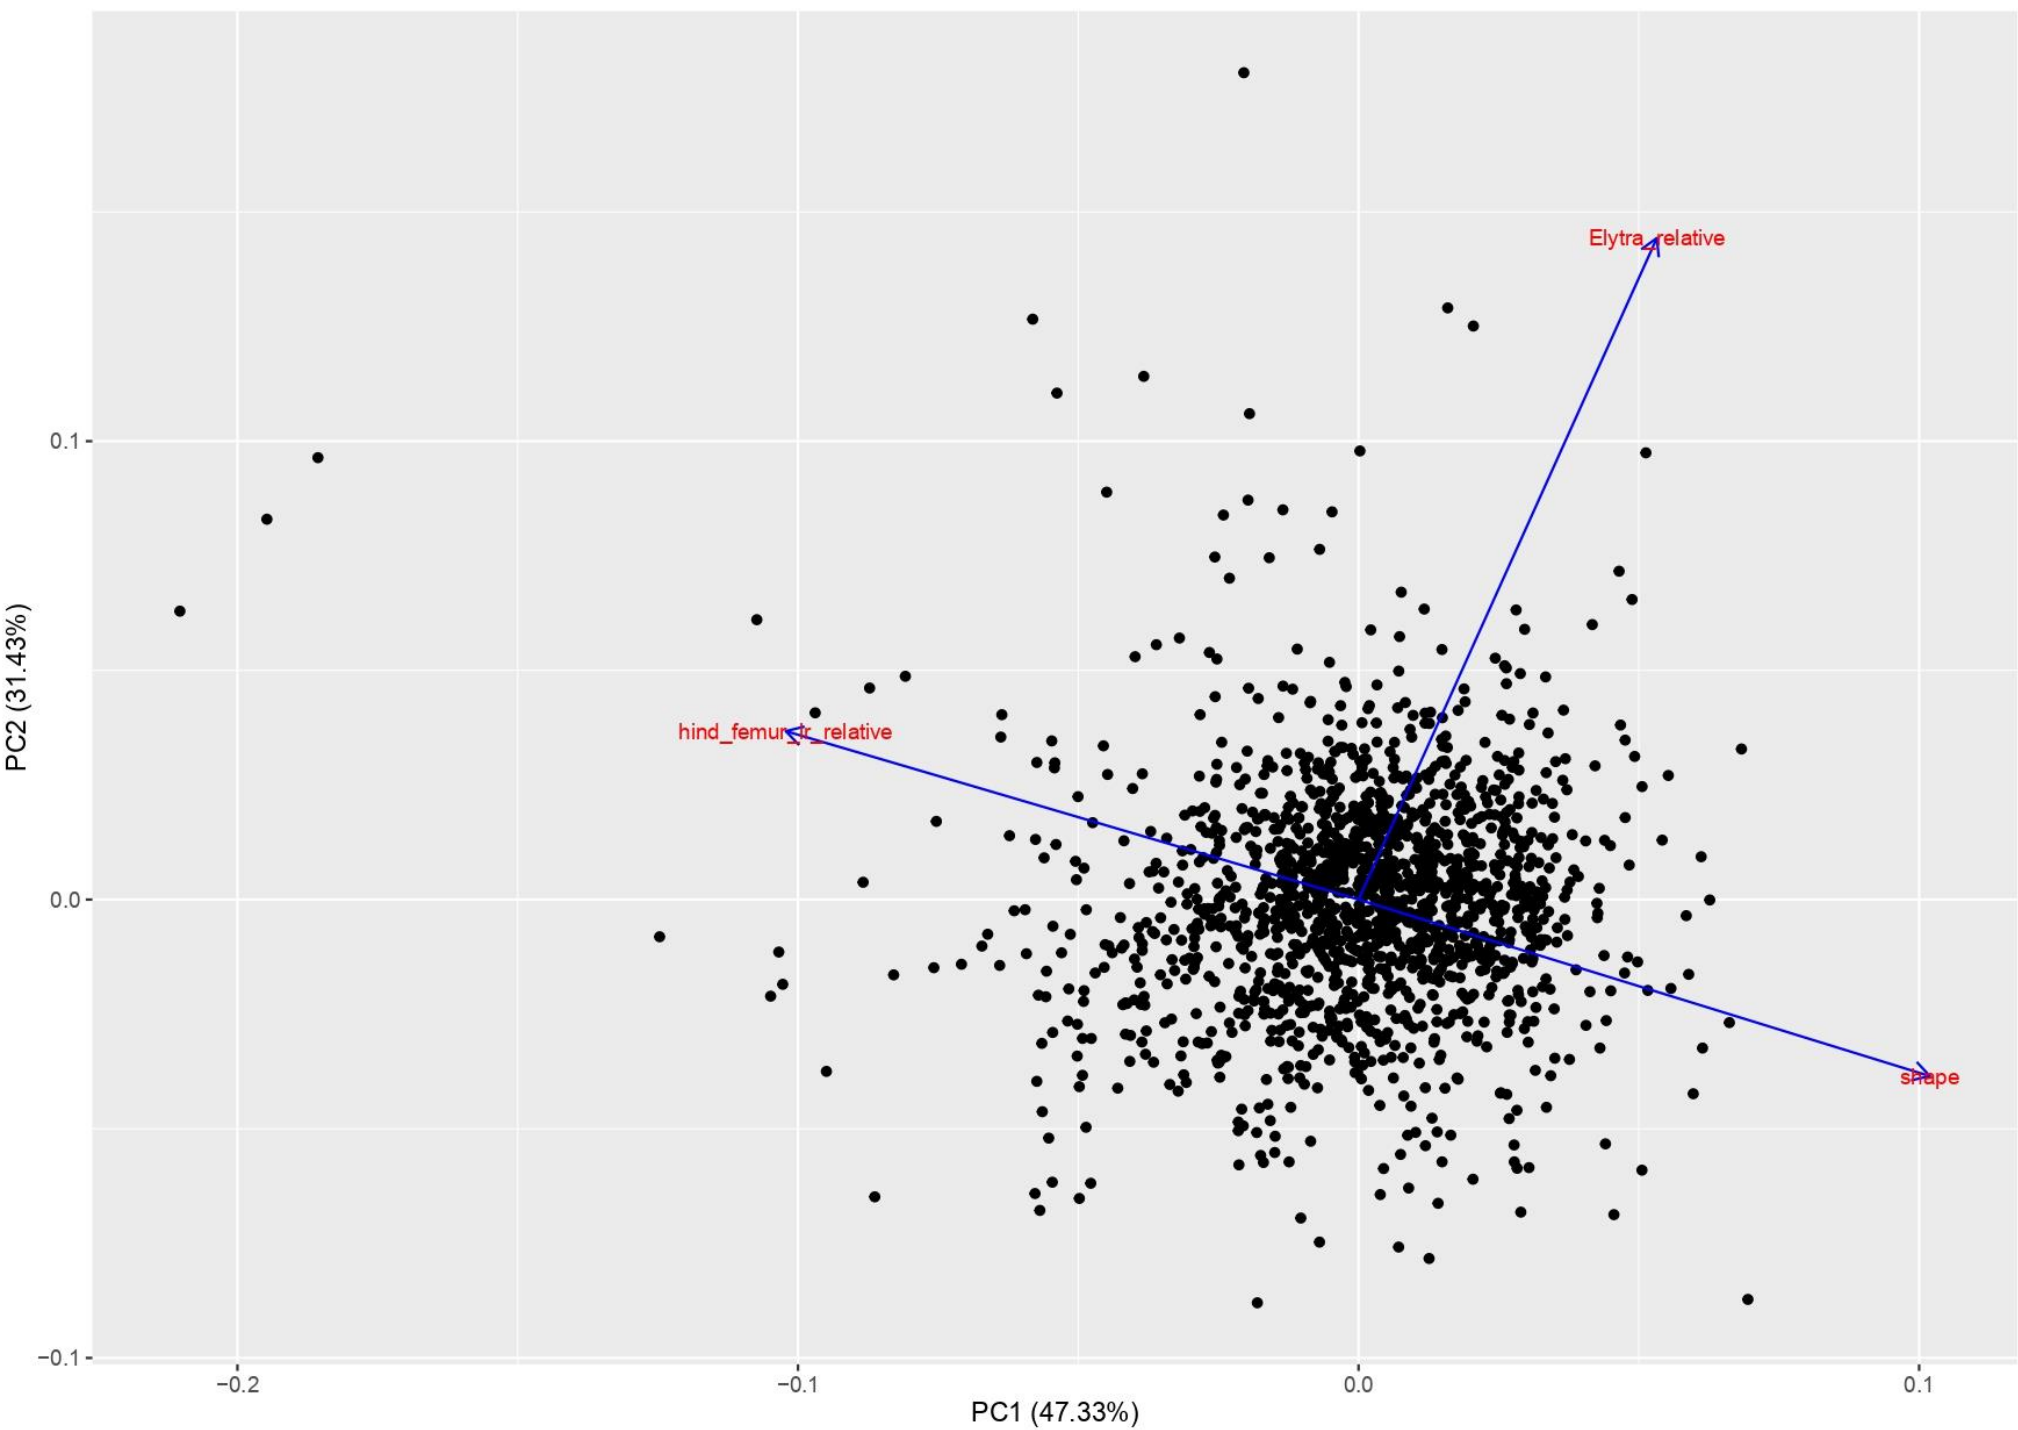

Figure S2  
Large dungbeetles  
*Typhaeus typhoeus*  
Eigenvalue 0.004

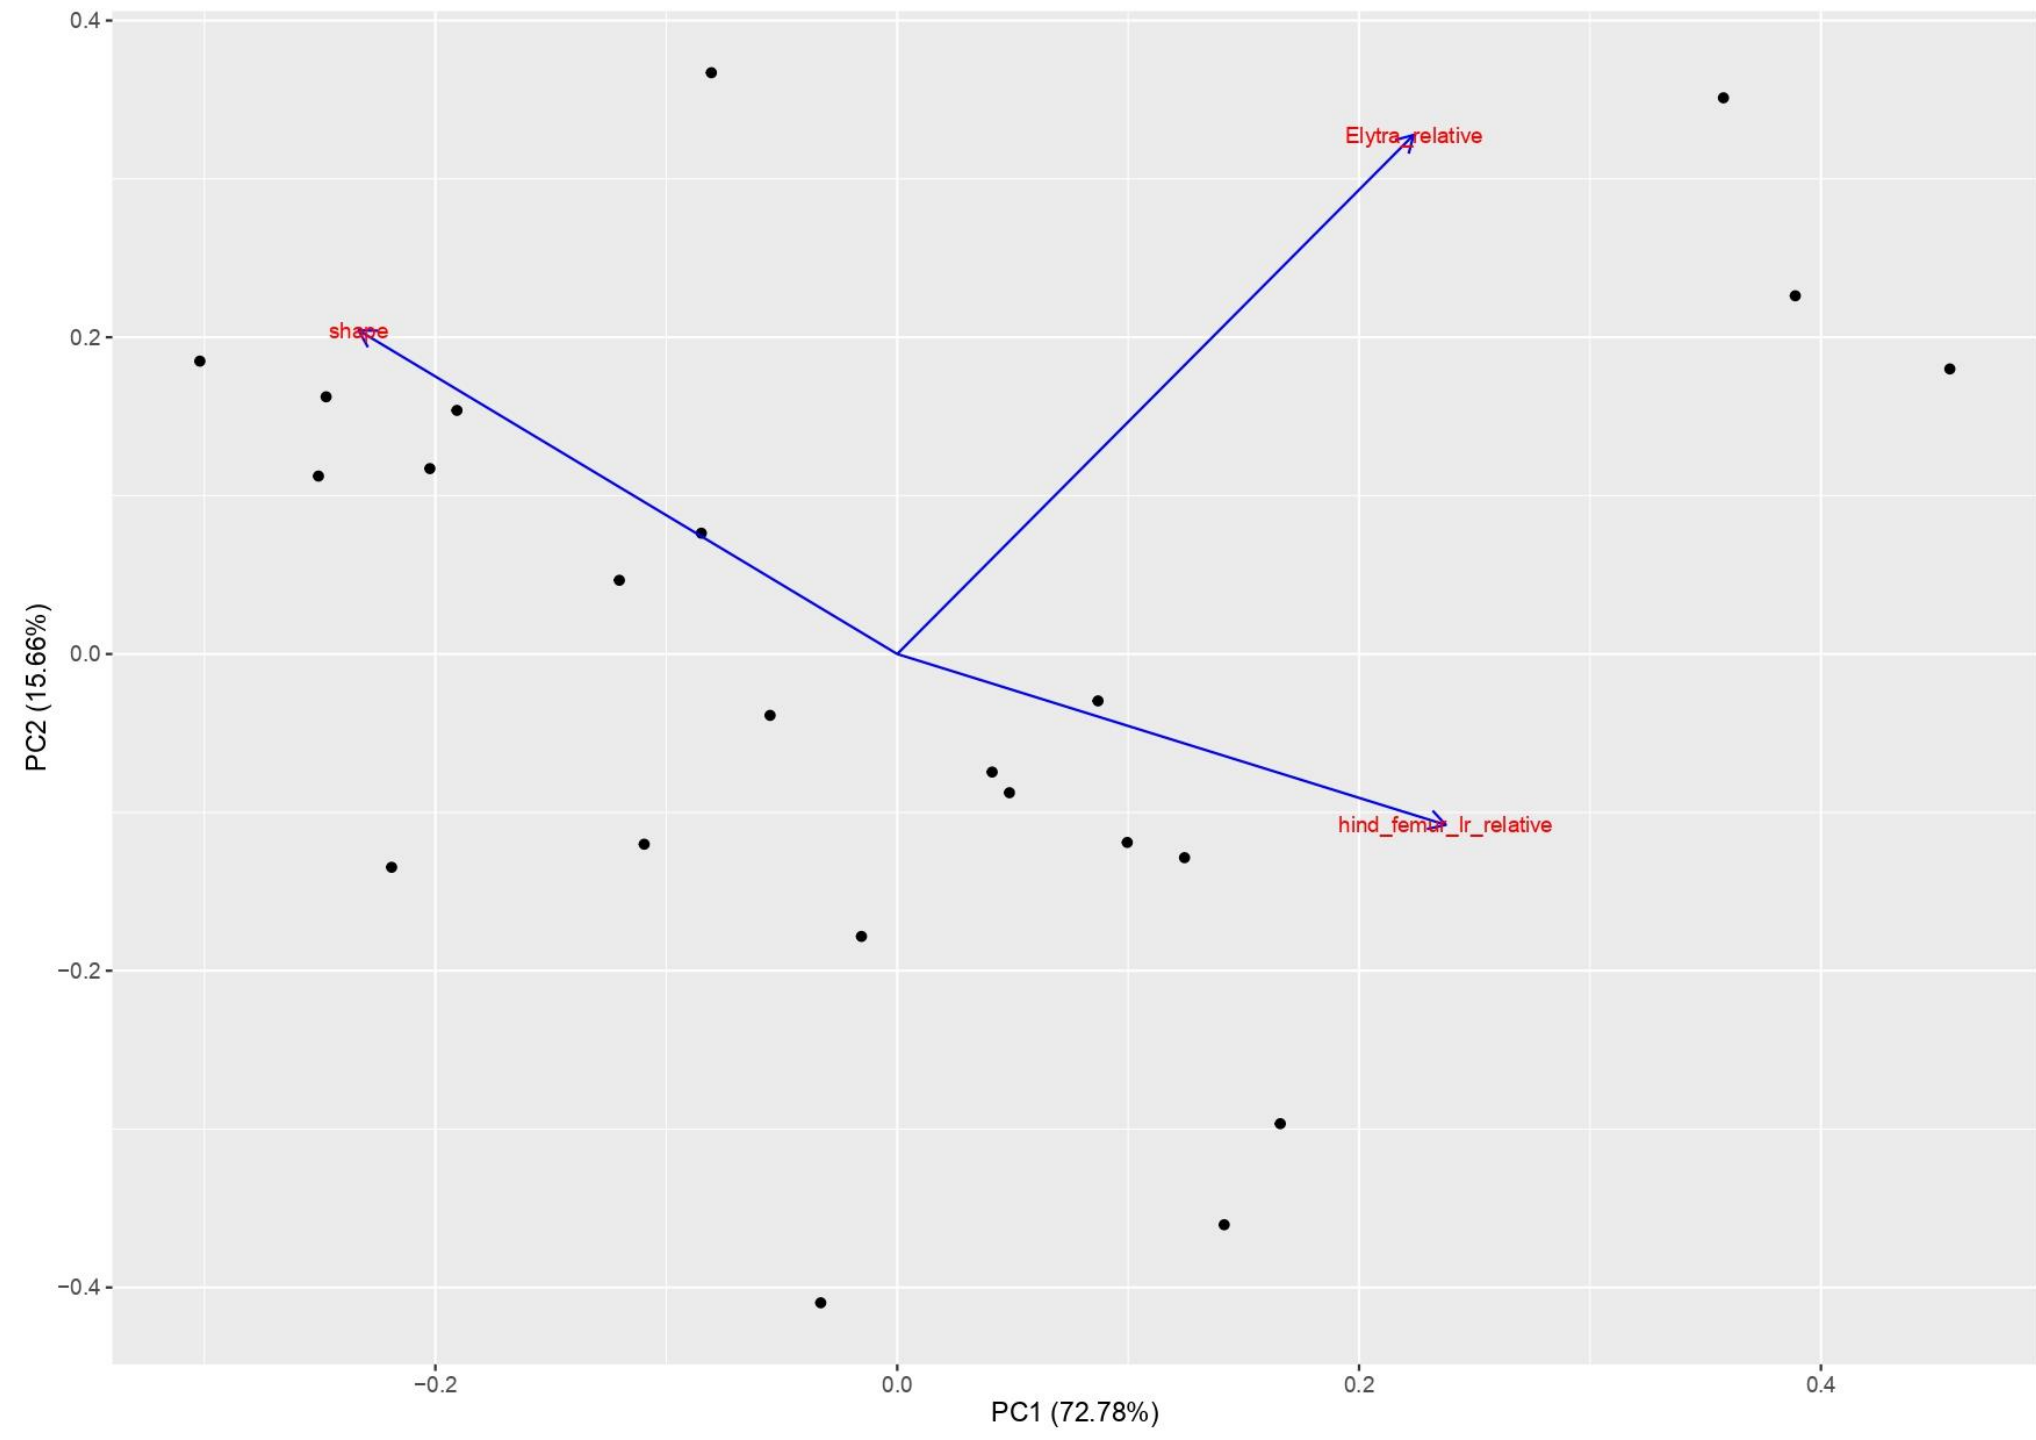

Figure S2  
Large dungbeetles  
*Trypocopris vernalis*  
Eigenvalue 0.002

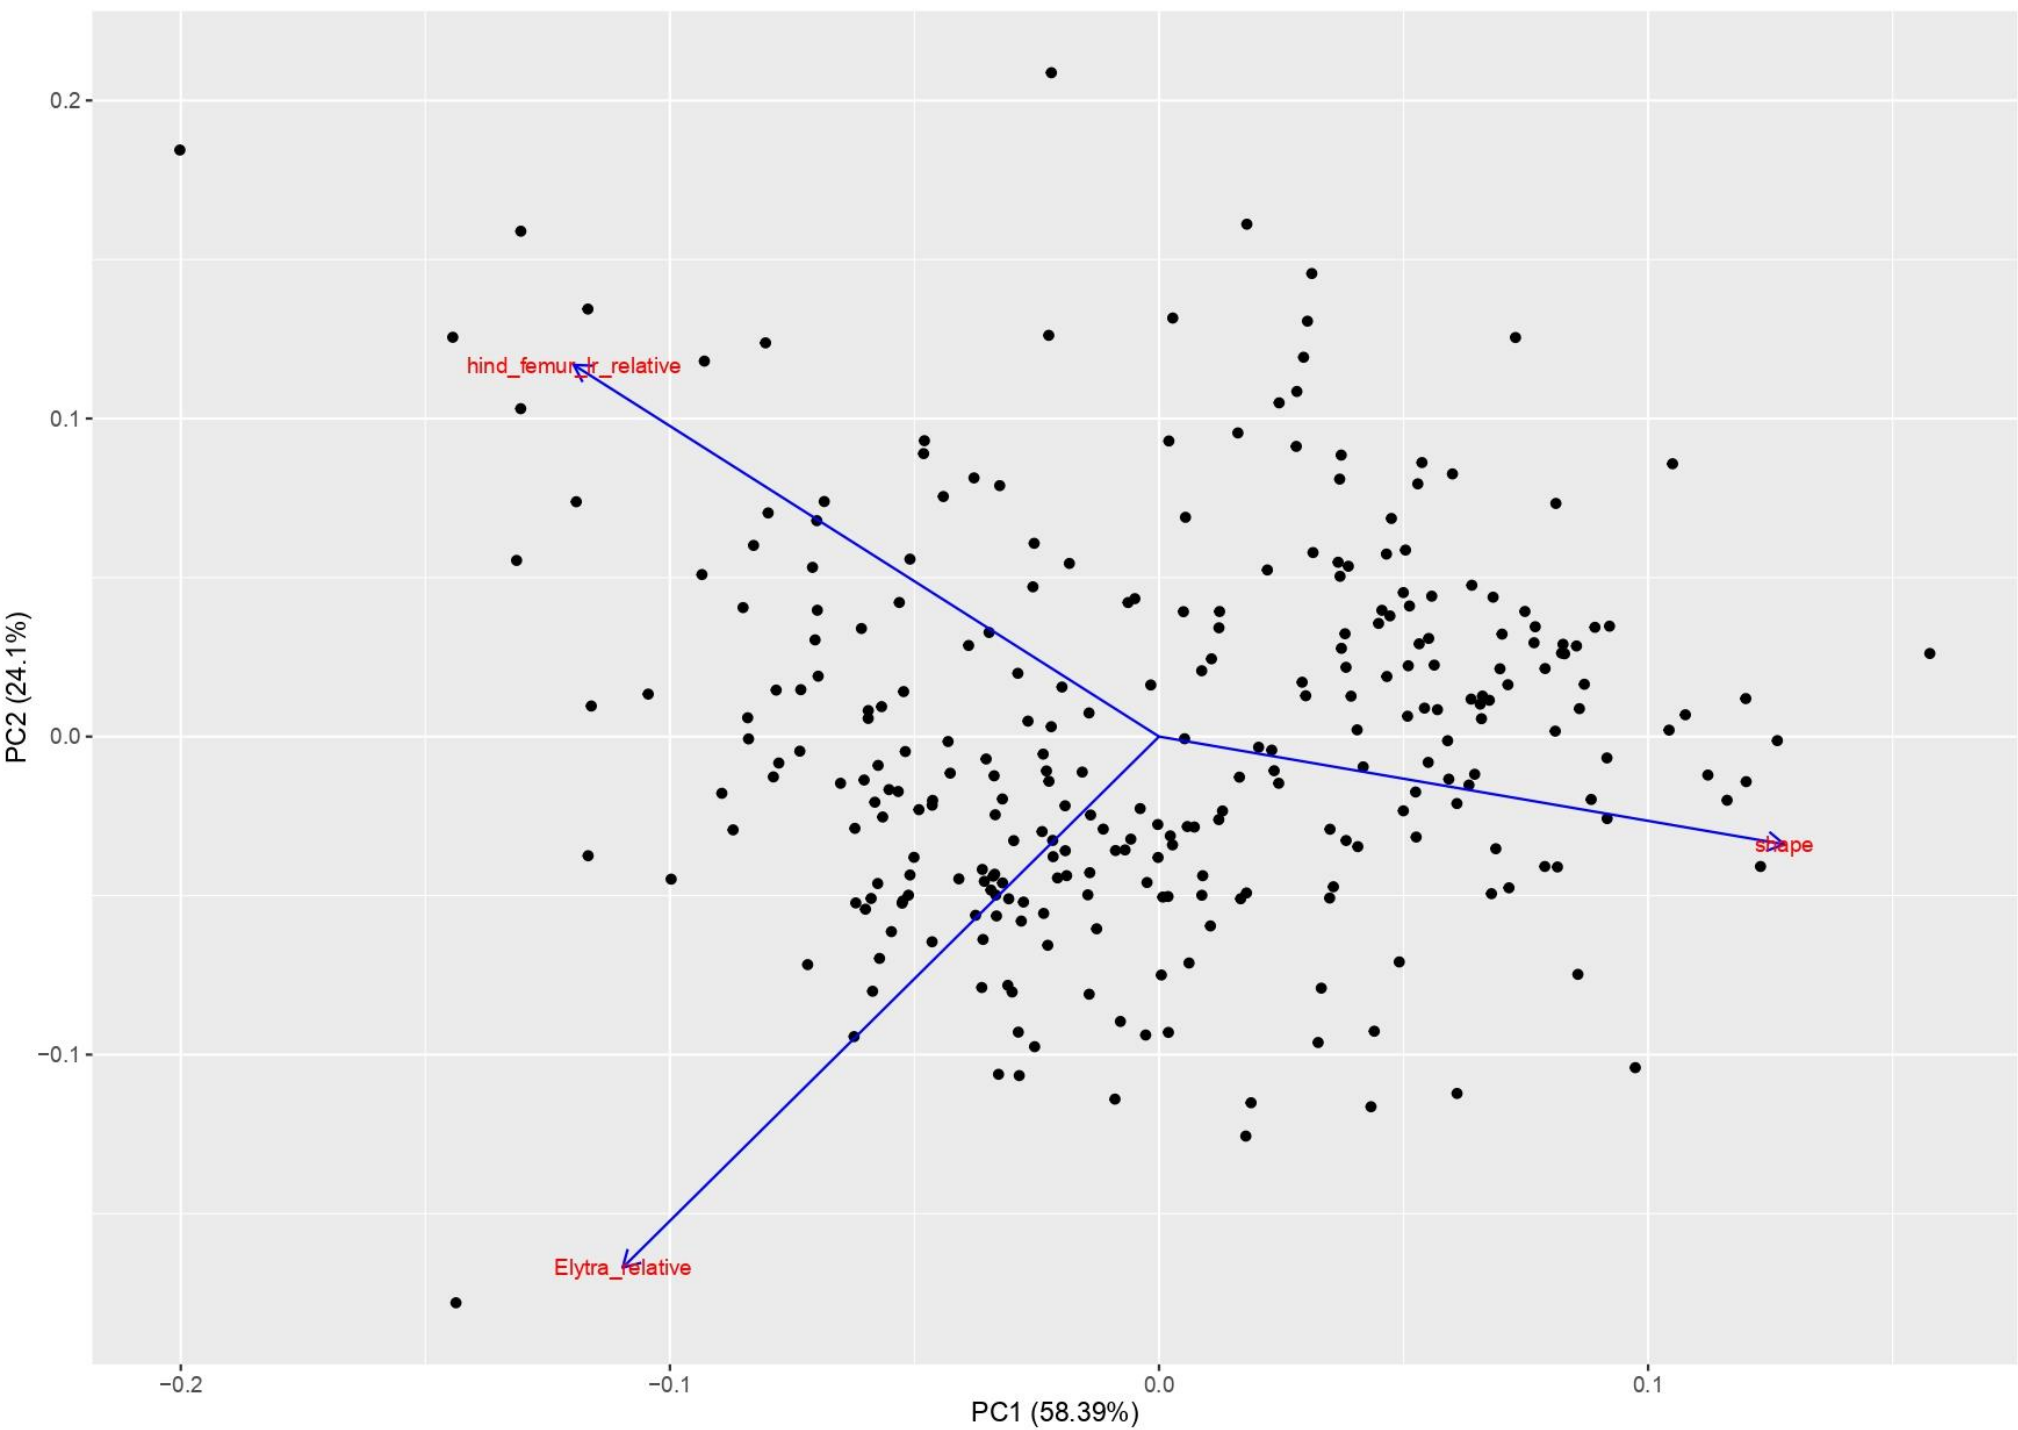

Figure S2  
Small dungbeetles  
*Aphodius ater*  
Eigenvalue 0.005

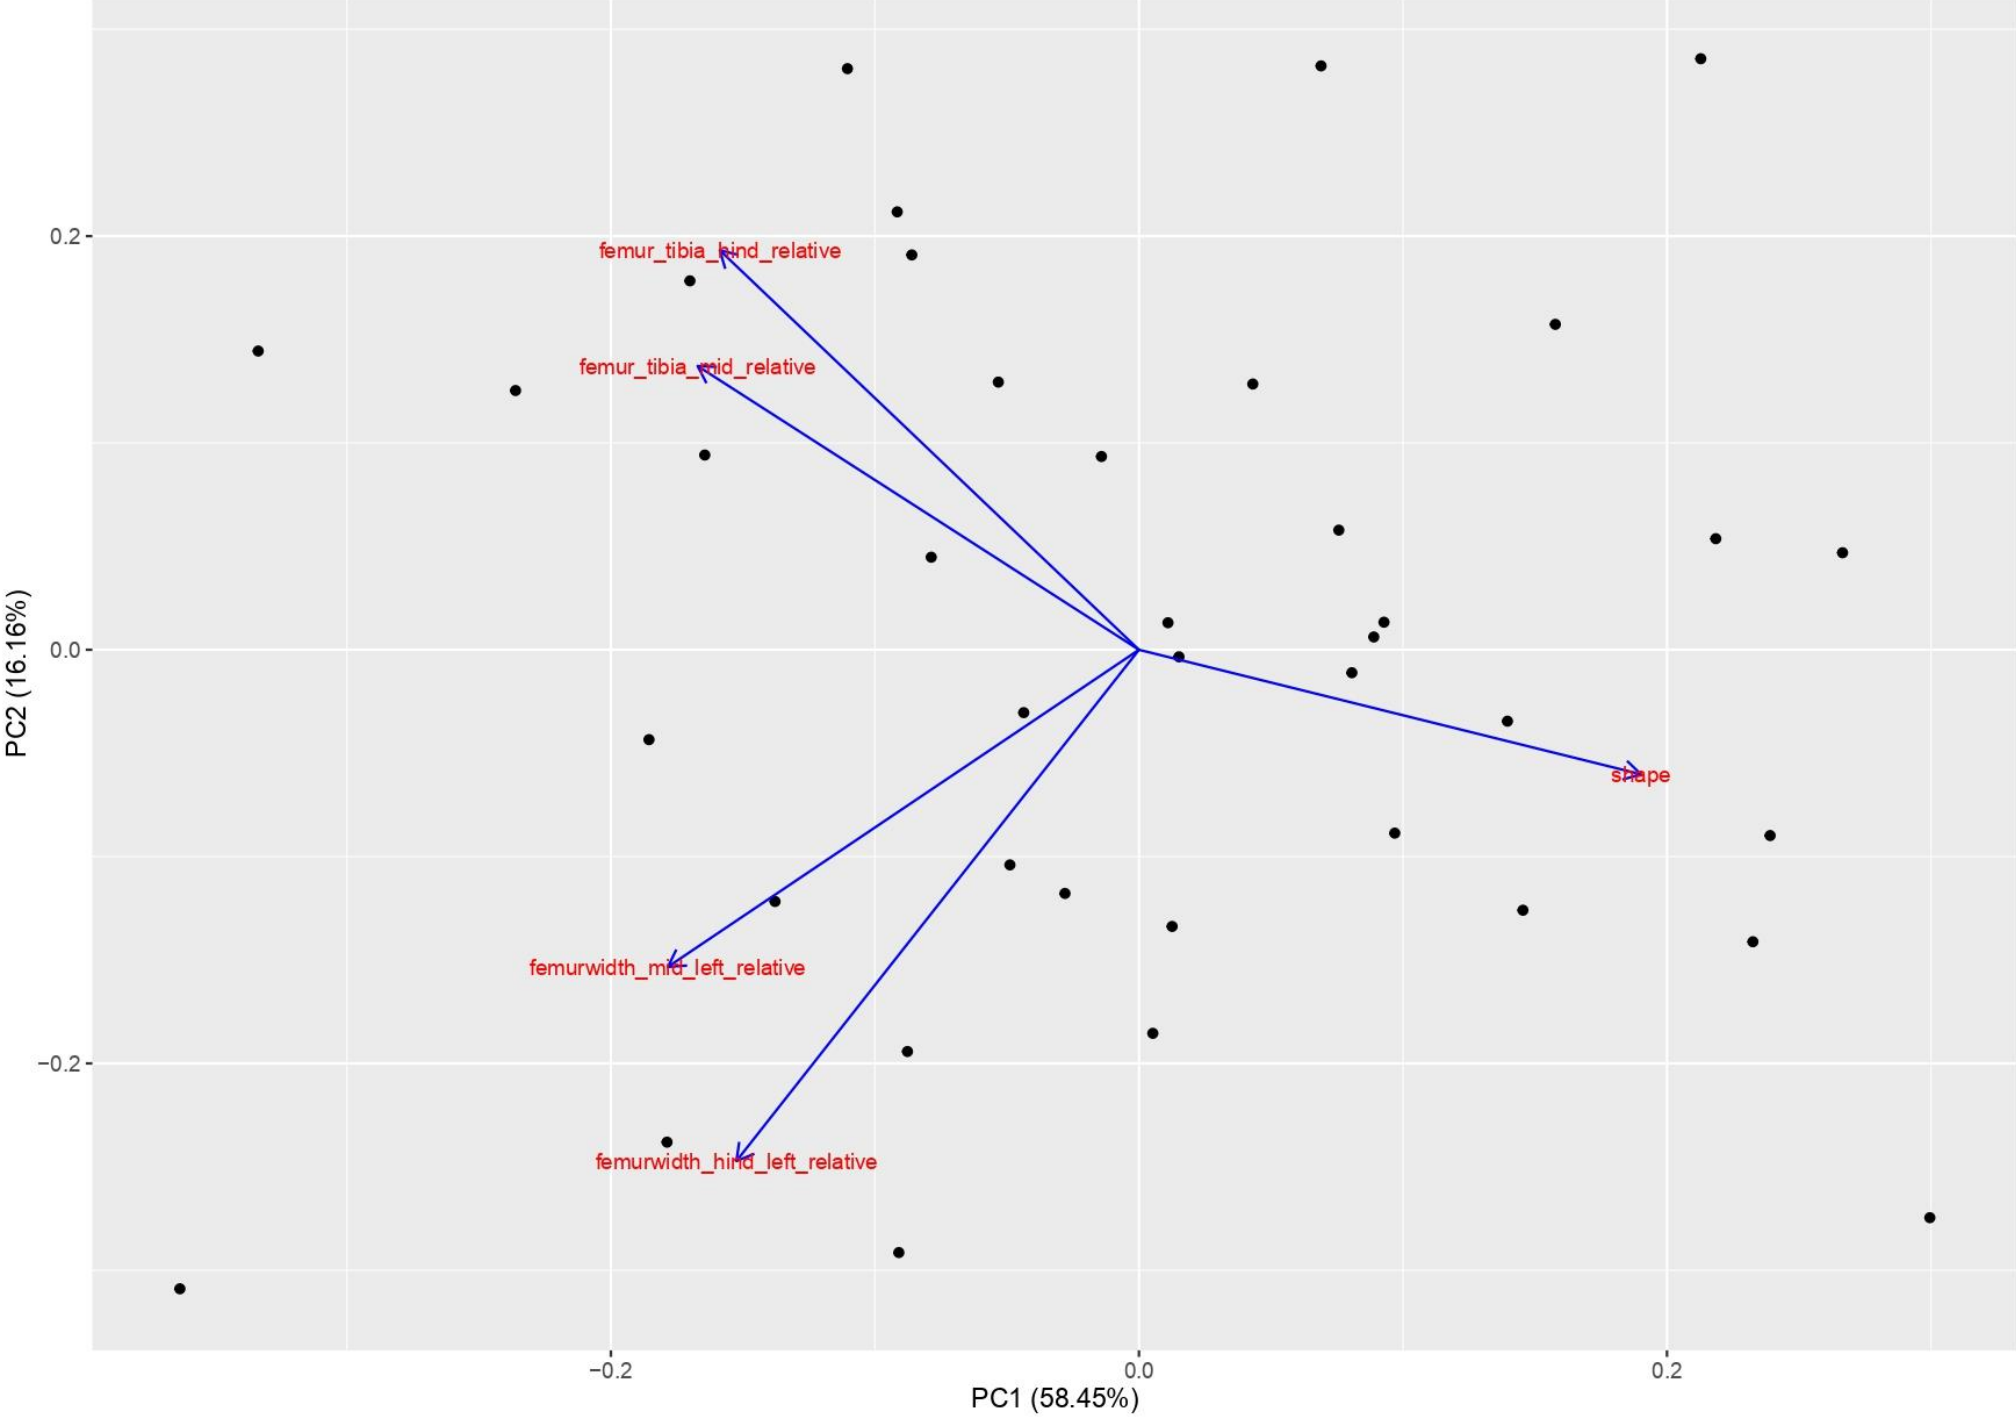

Figure S2  
Small dungbeetles  
*Aphodius depressus*  
Eigenvalue 0.006

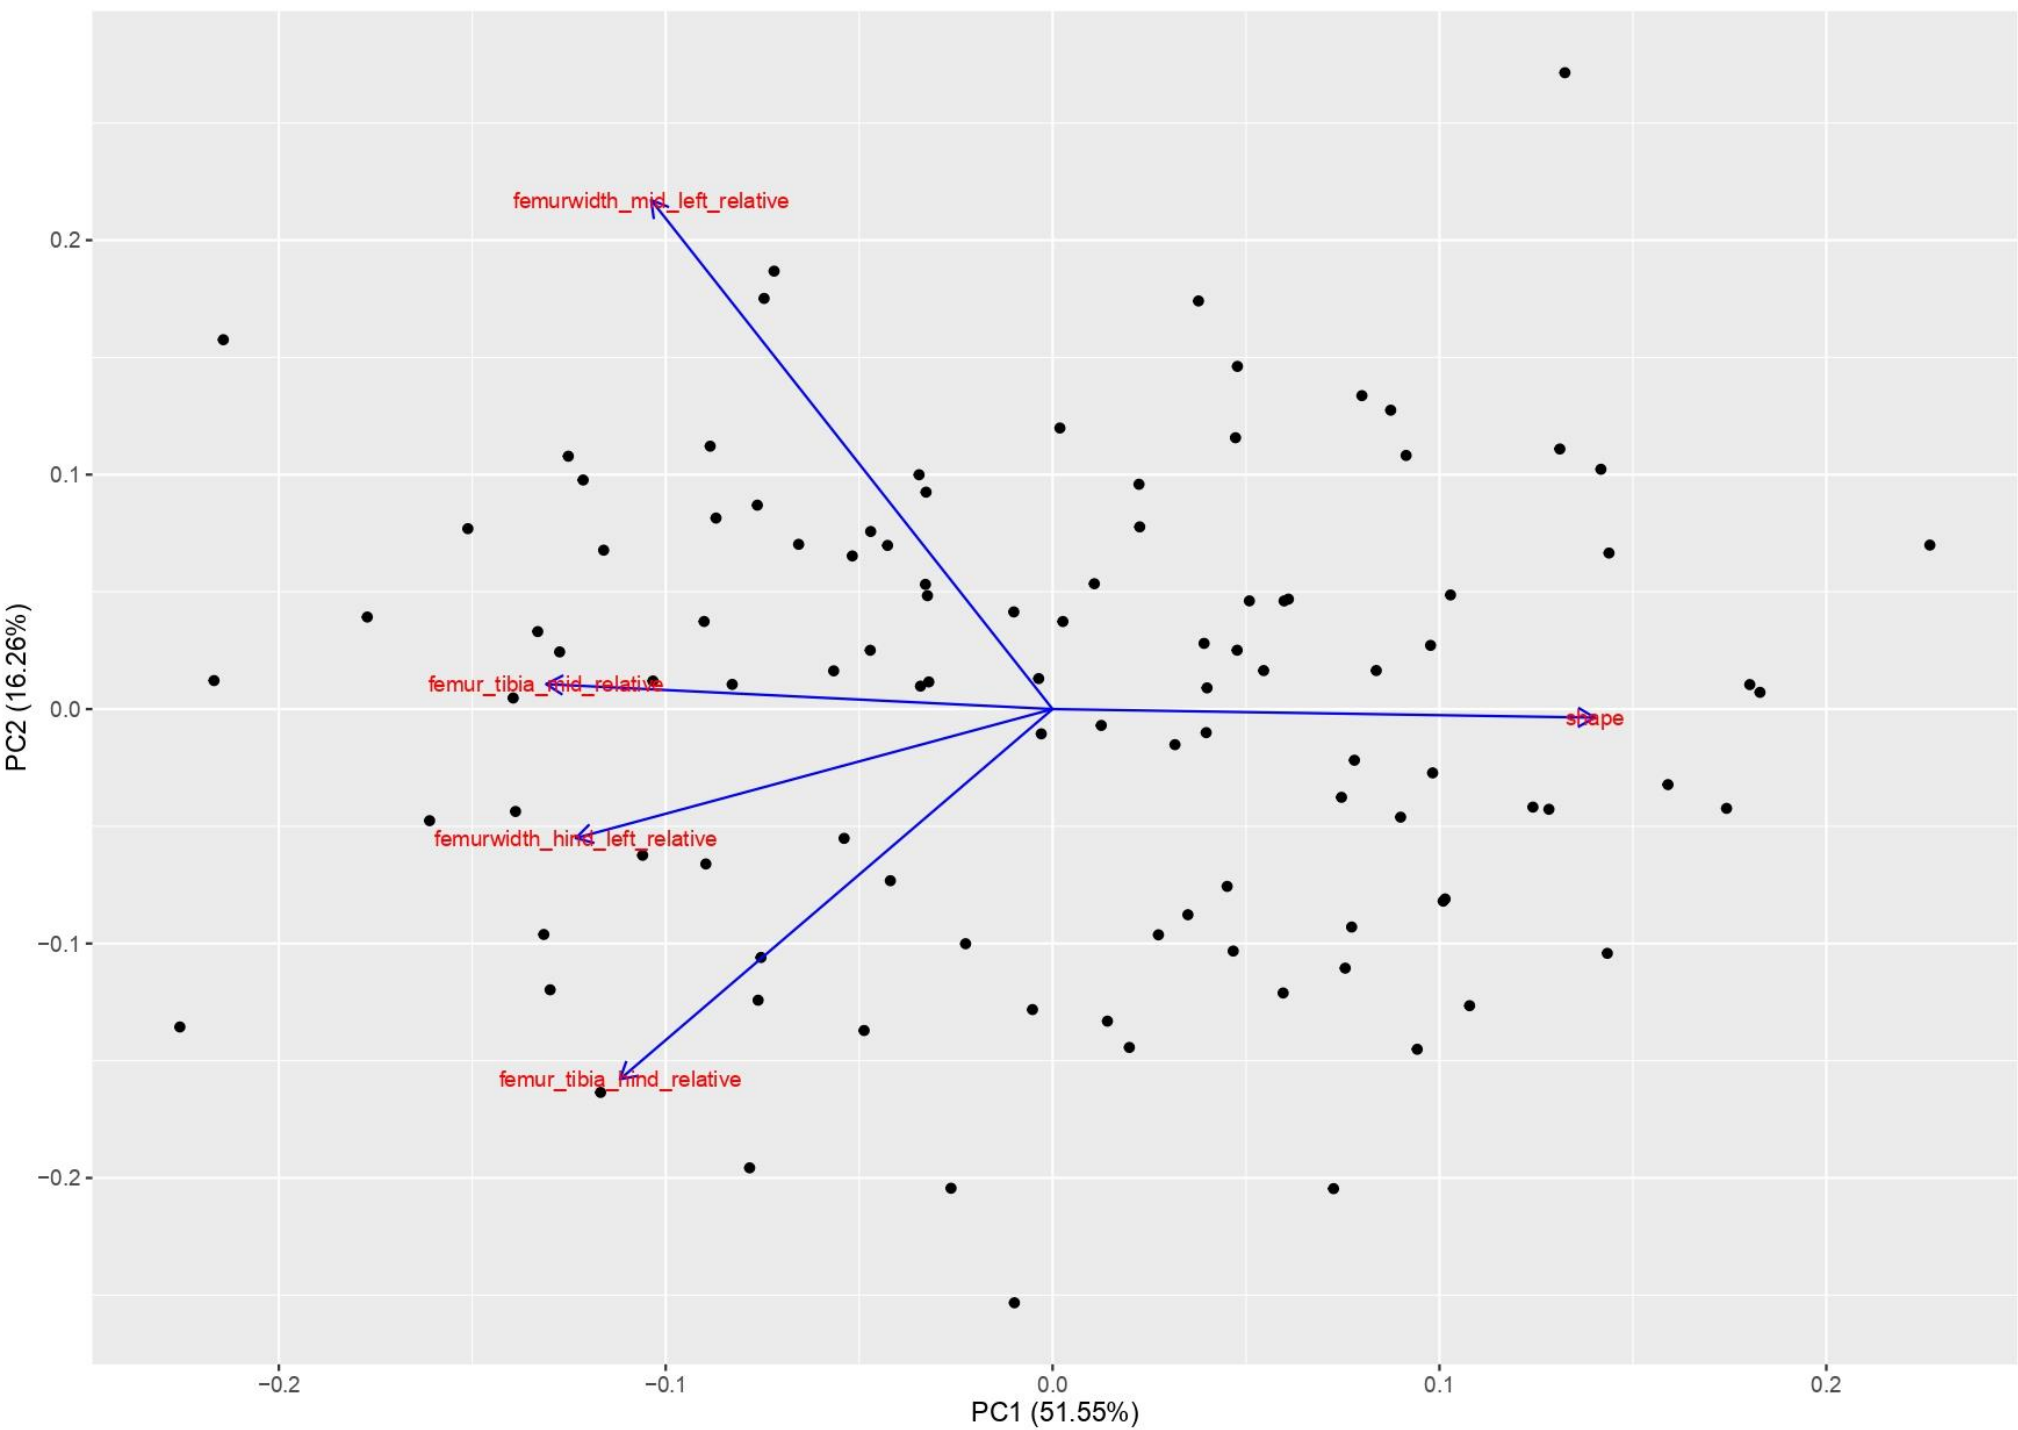

Figure S2  
Small dungbeetles  
*Onthophagus fracticornis*  
Eigenvalue 0.004

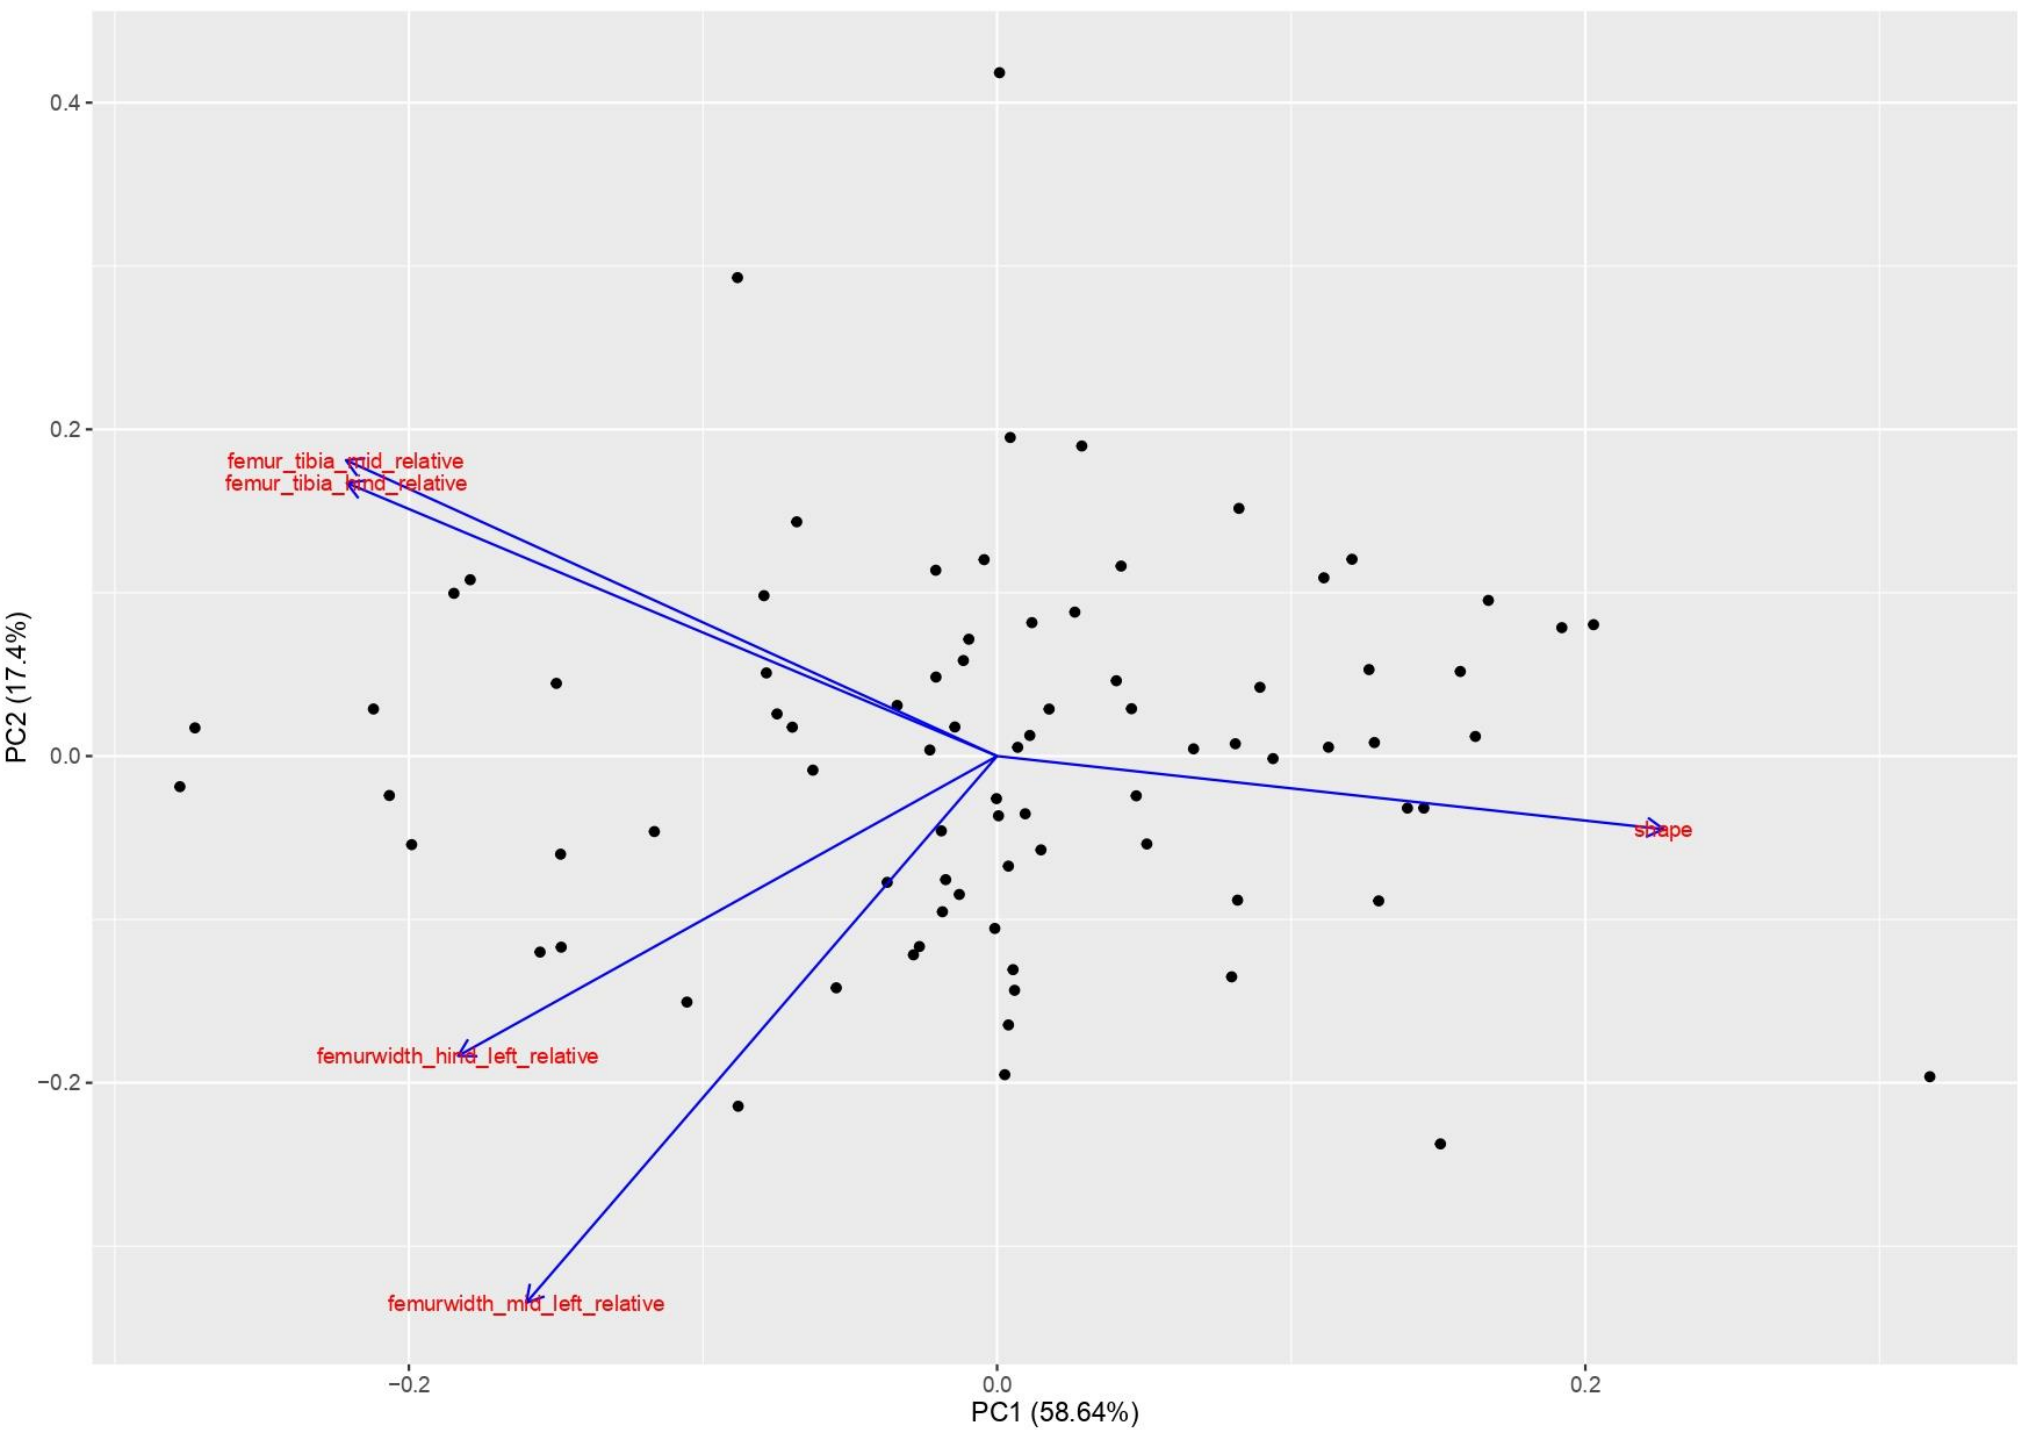

Figure S2  
Small dungbeetles  
*Onthophagus similis*  
Eigenvalue 0.004

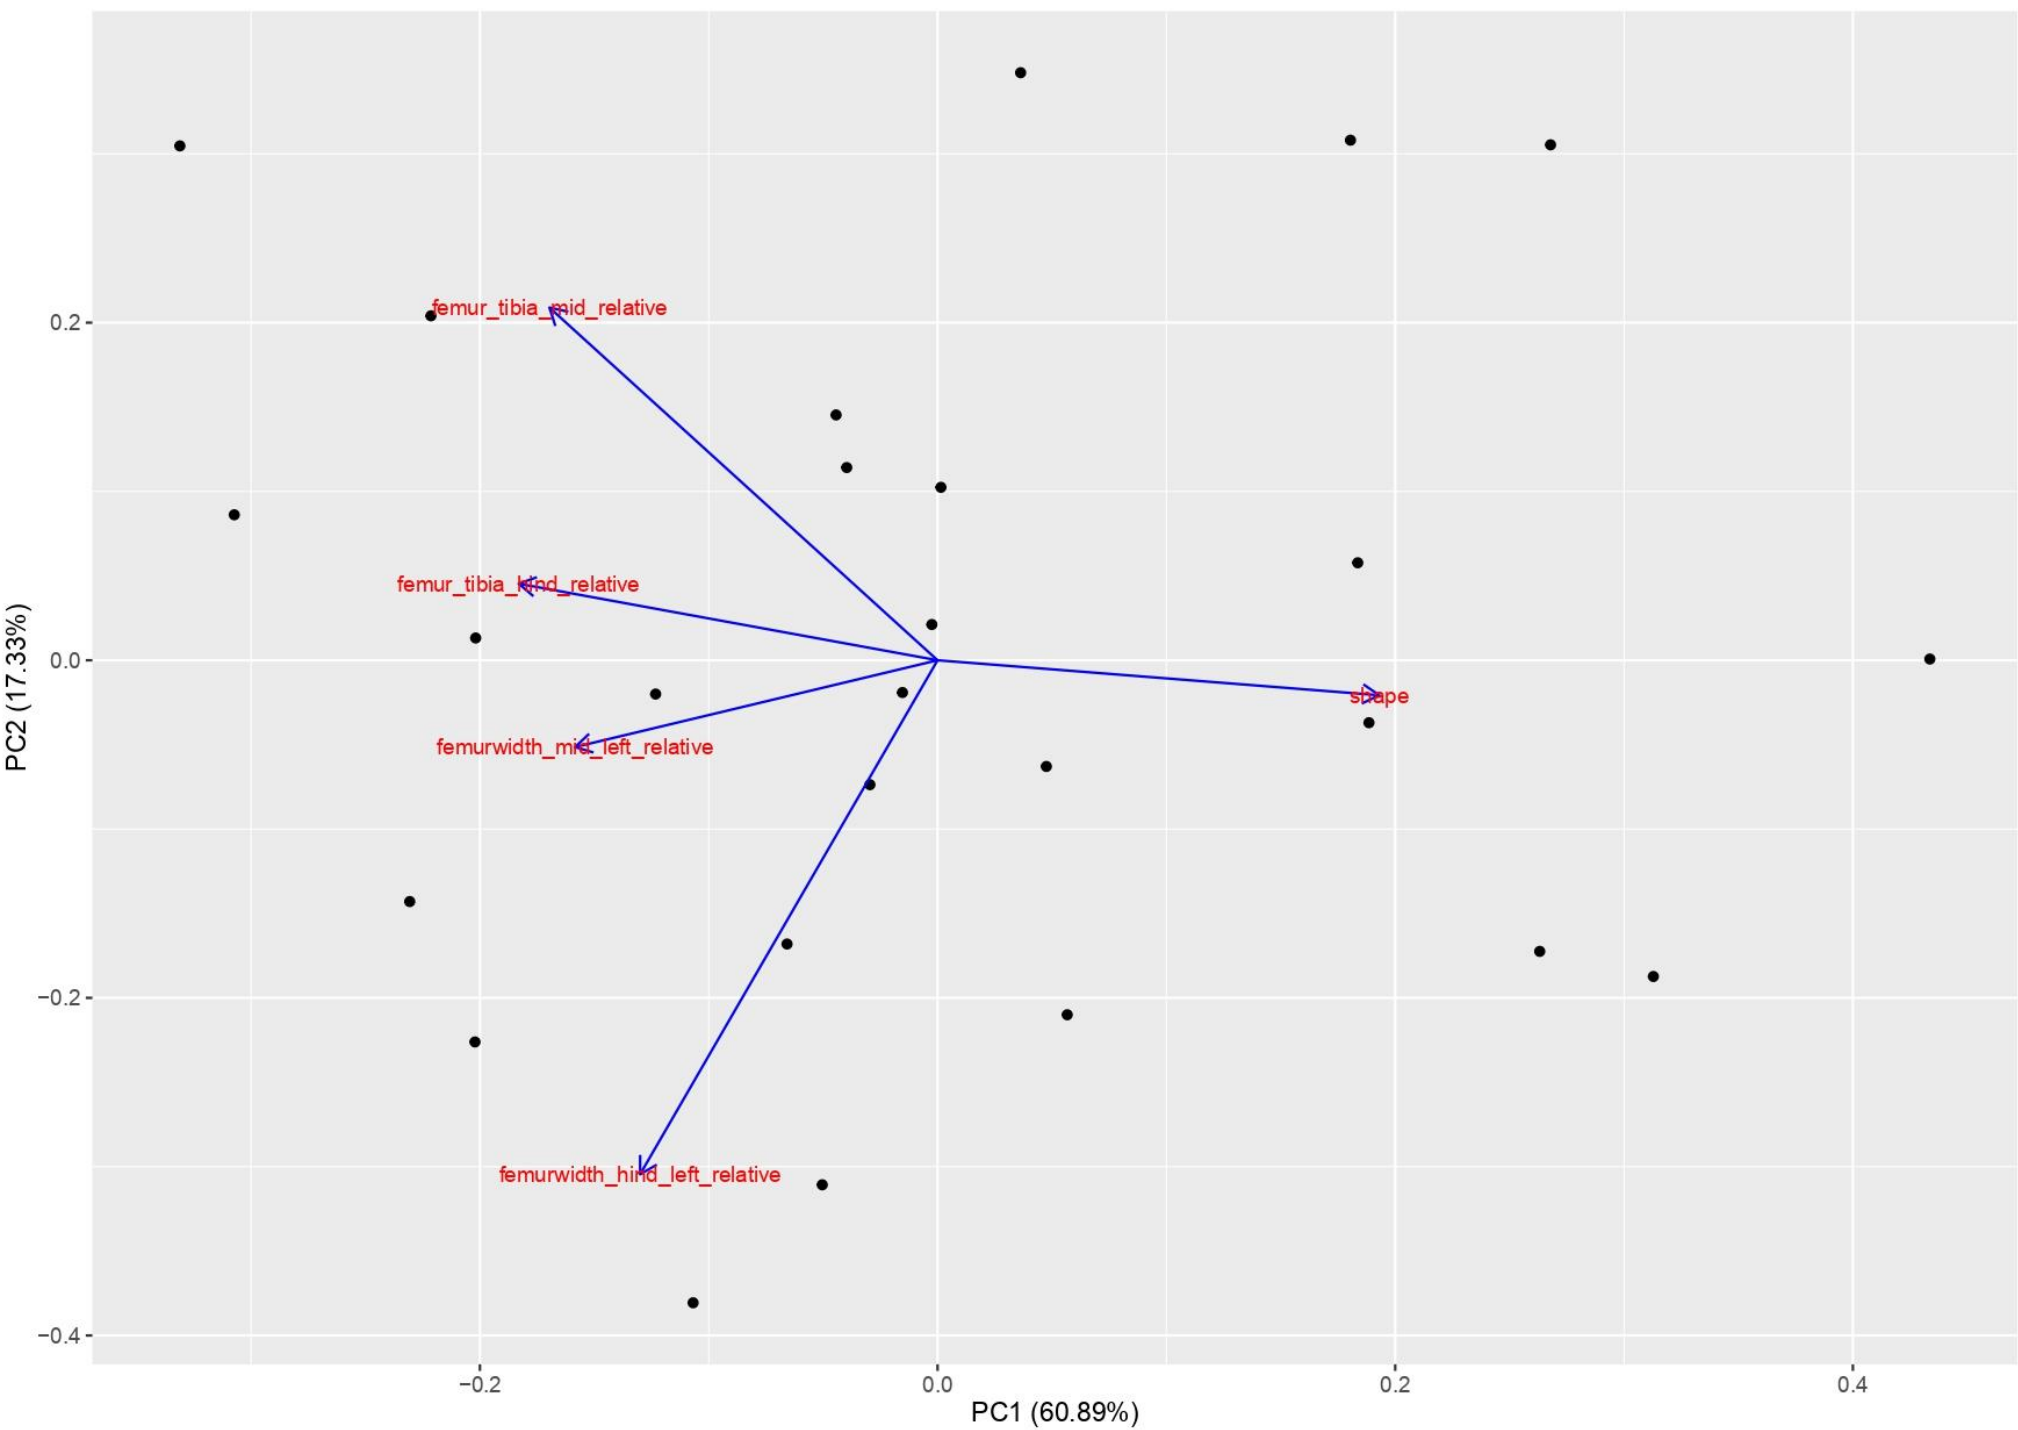

Figure S2  
Bees  
*Bombus lapidarius*  
Eigenvalue 0.558

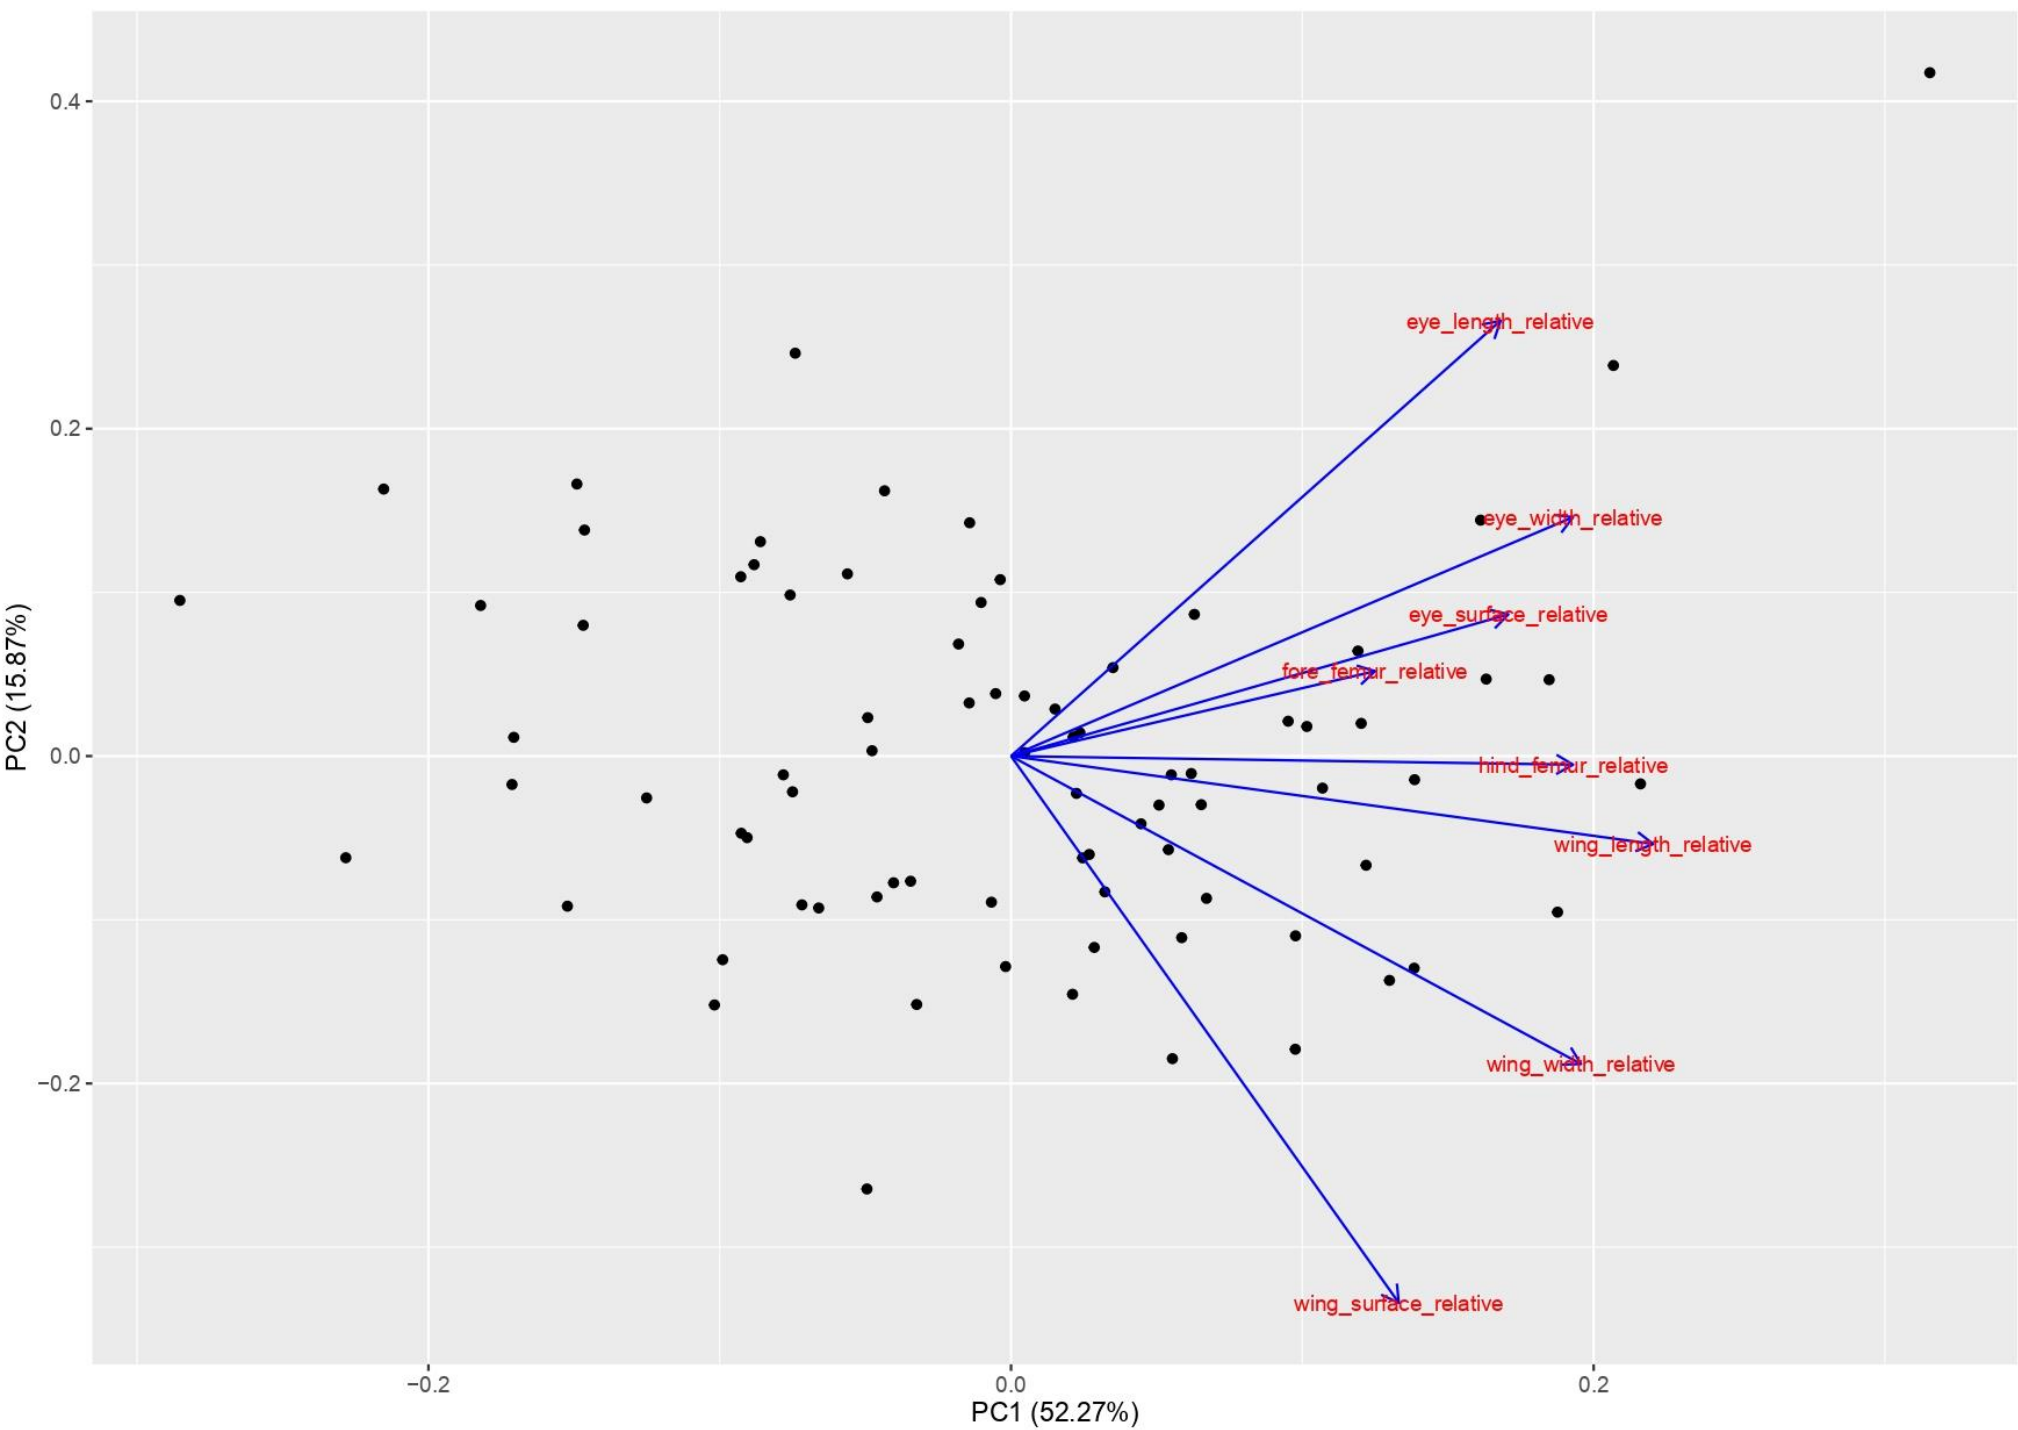



Figure S2  
Bees  
*Bombus sylvorum*  
Eigenvalue 0.965

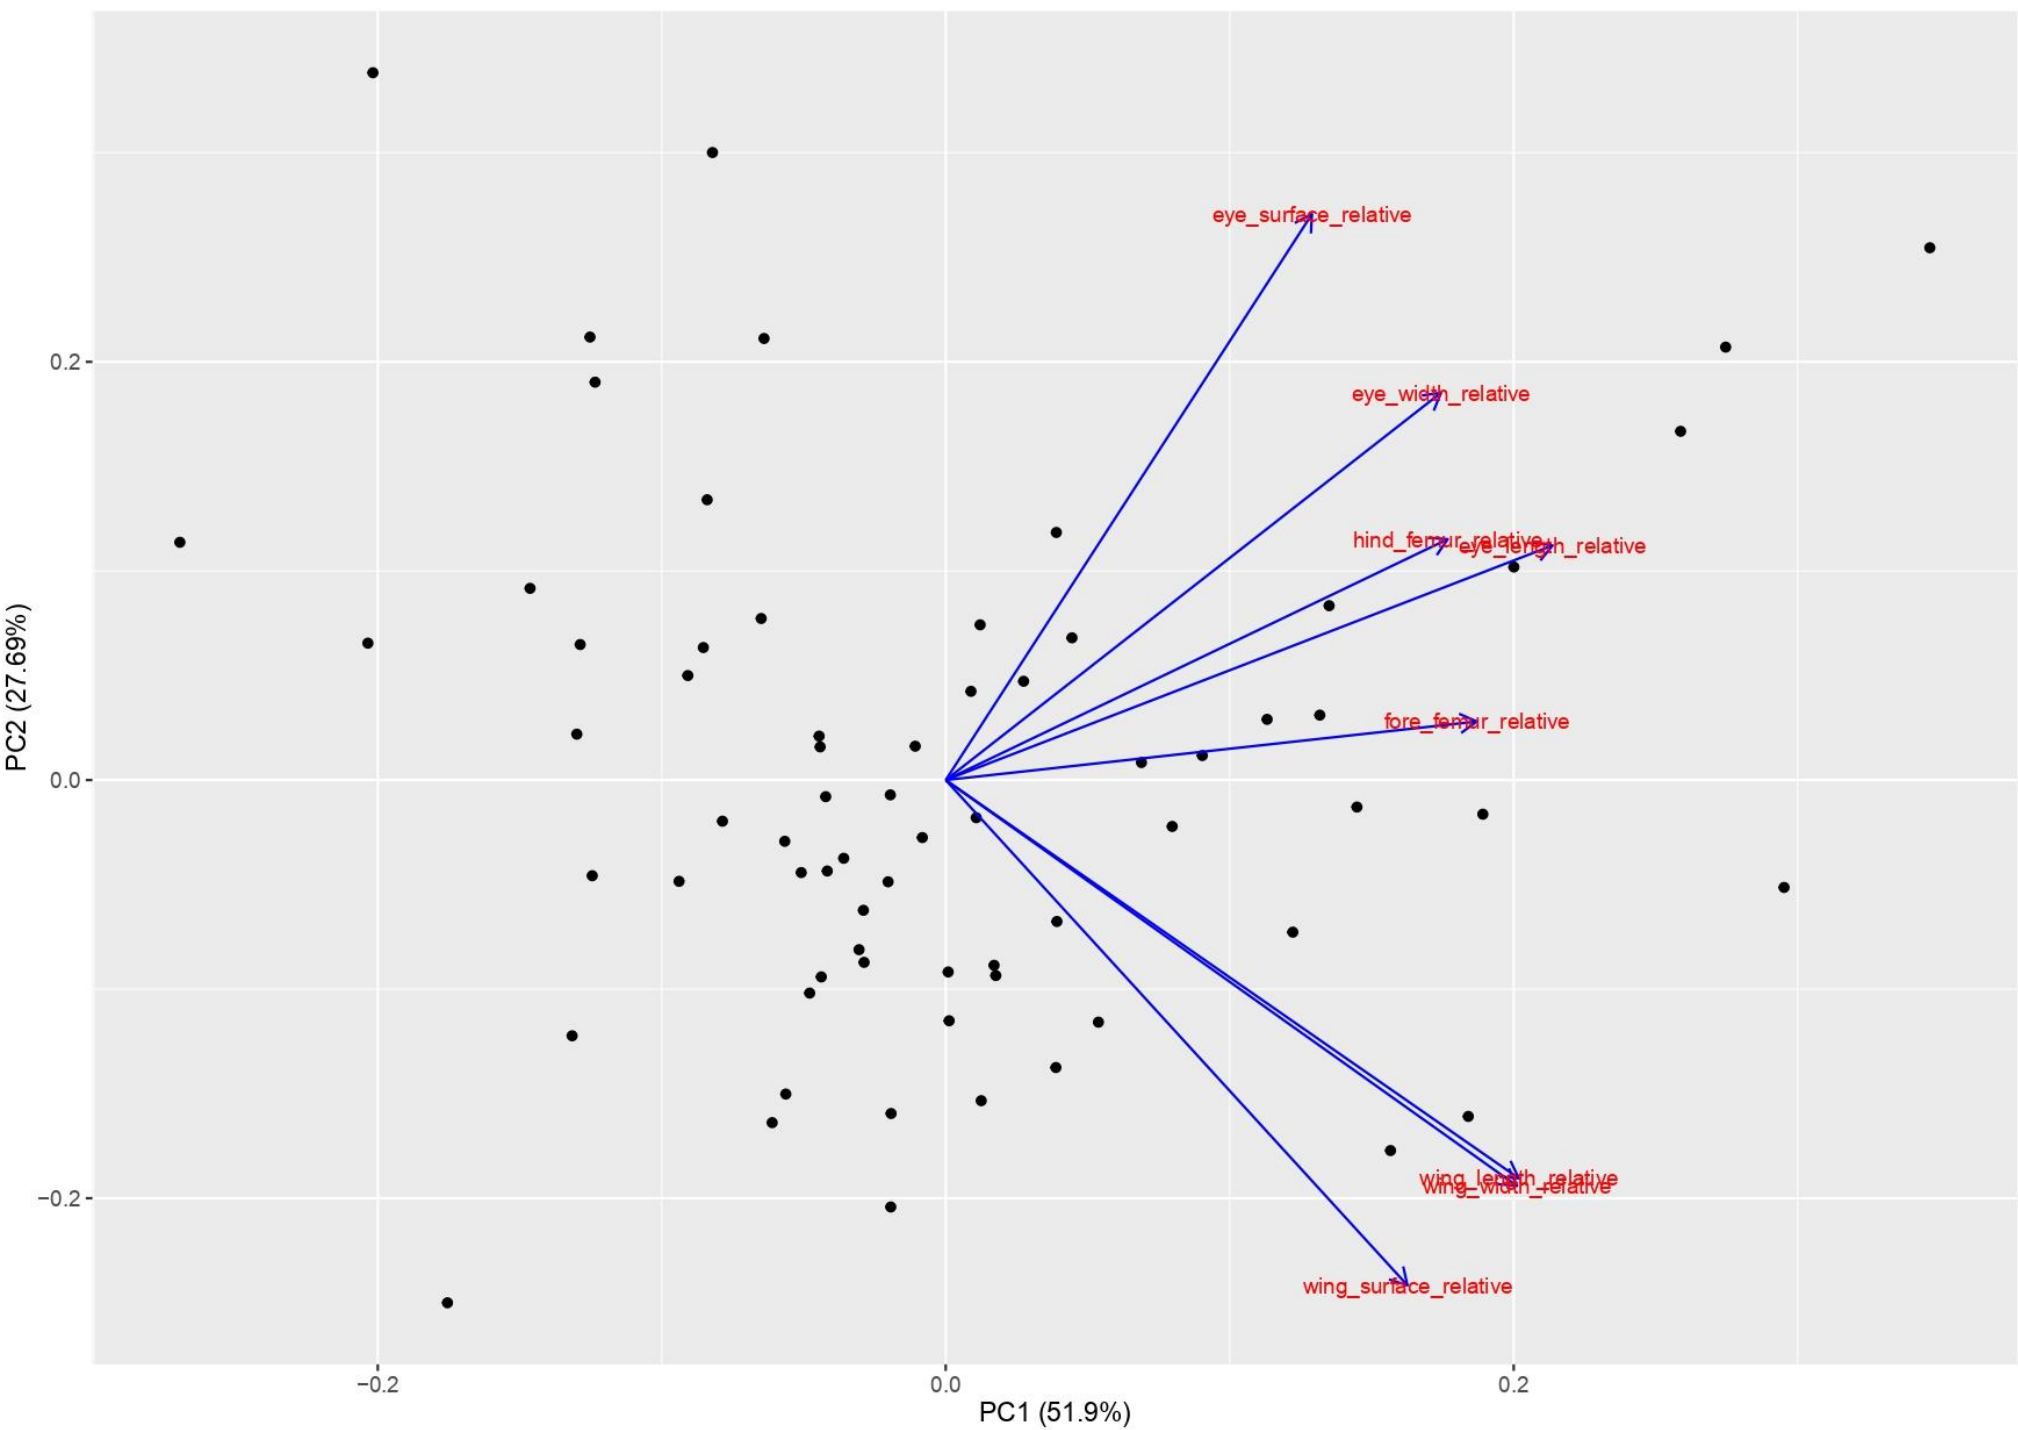

Figure S2  
Bees  
*Lasioglossus calceatum*  
Eigenvalue 0.579

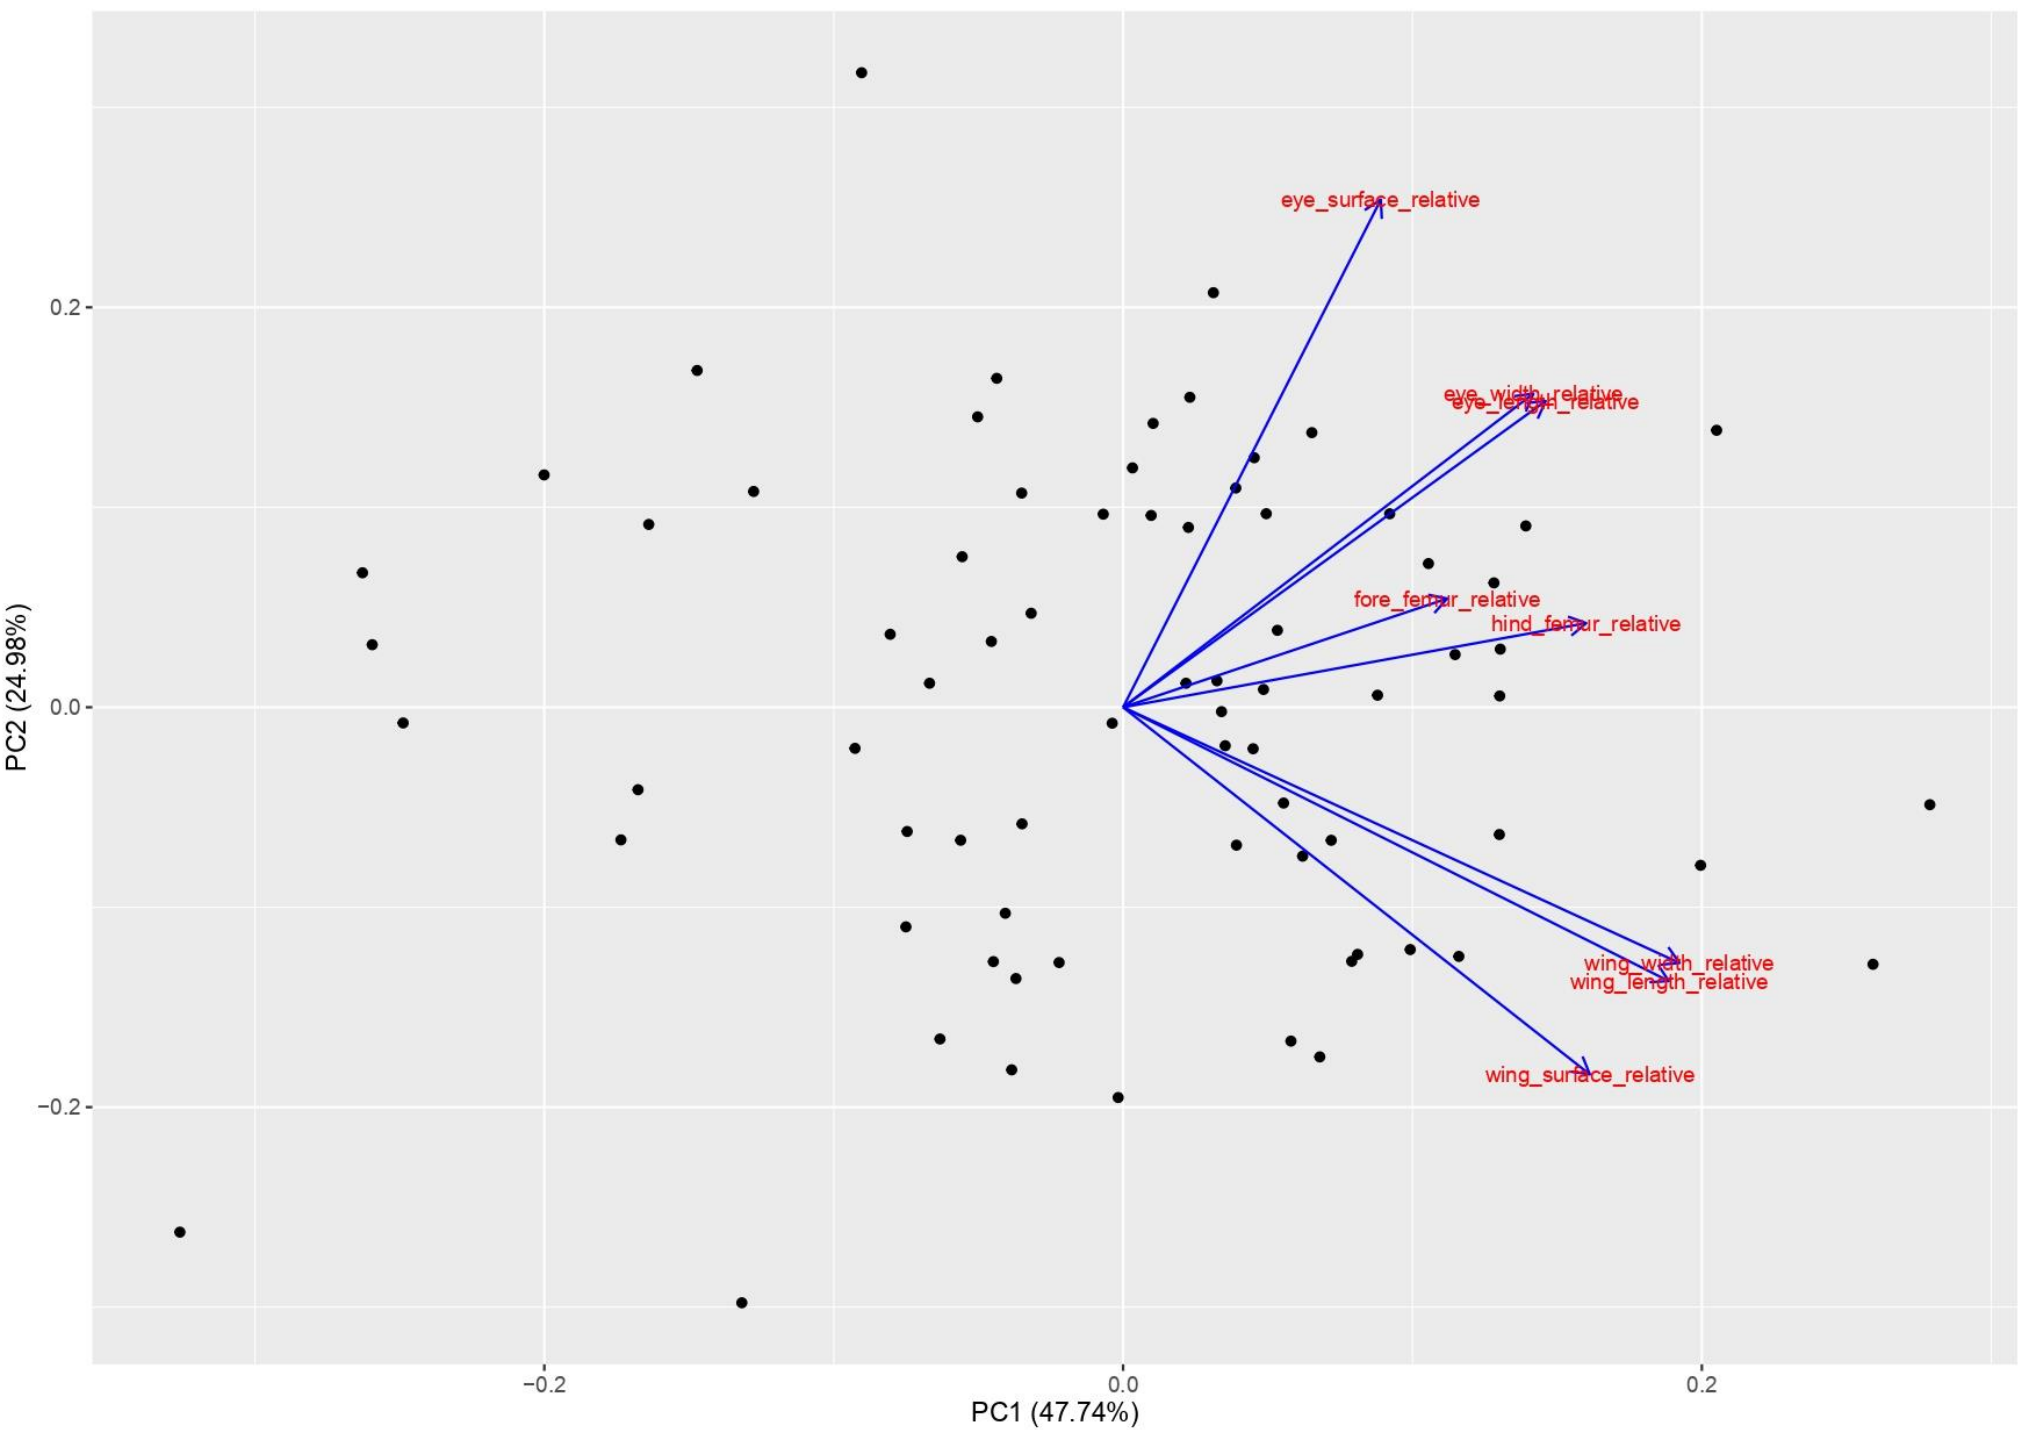

Figure S2  
Grasshoppers  
*Chorthippus biguttulus*  
Eigenvalue 0.052

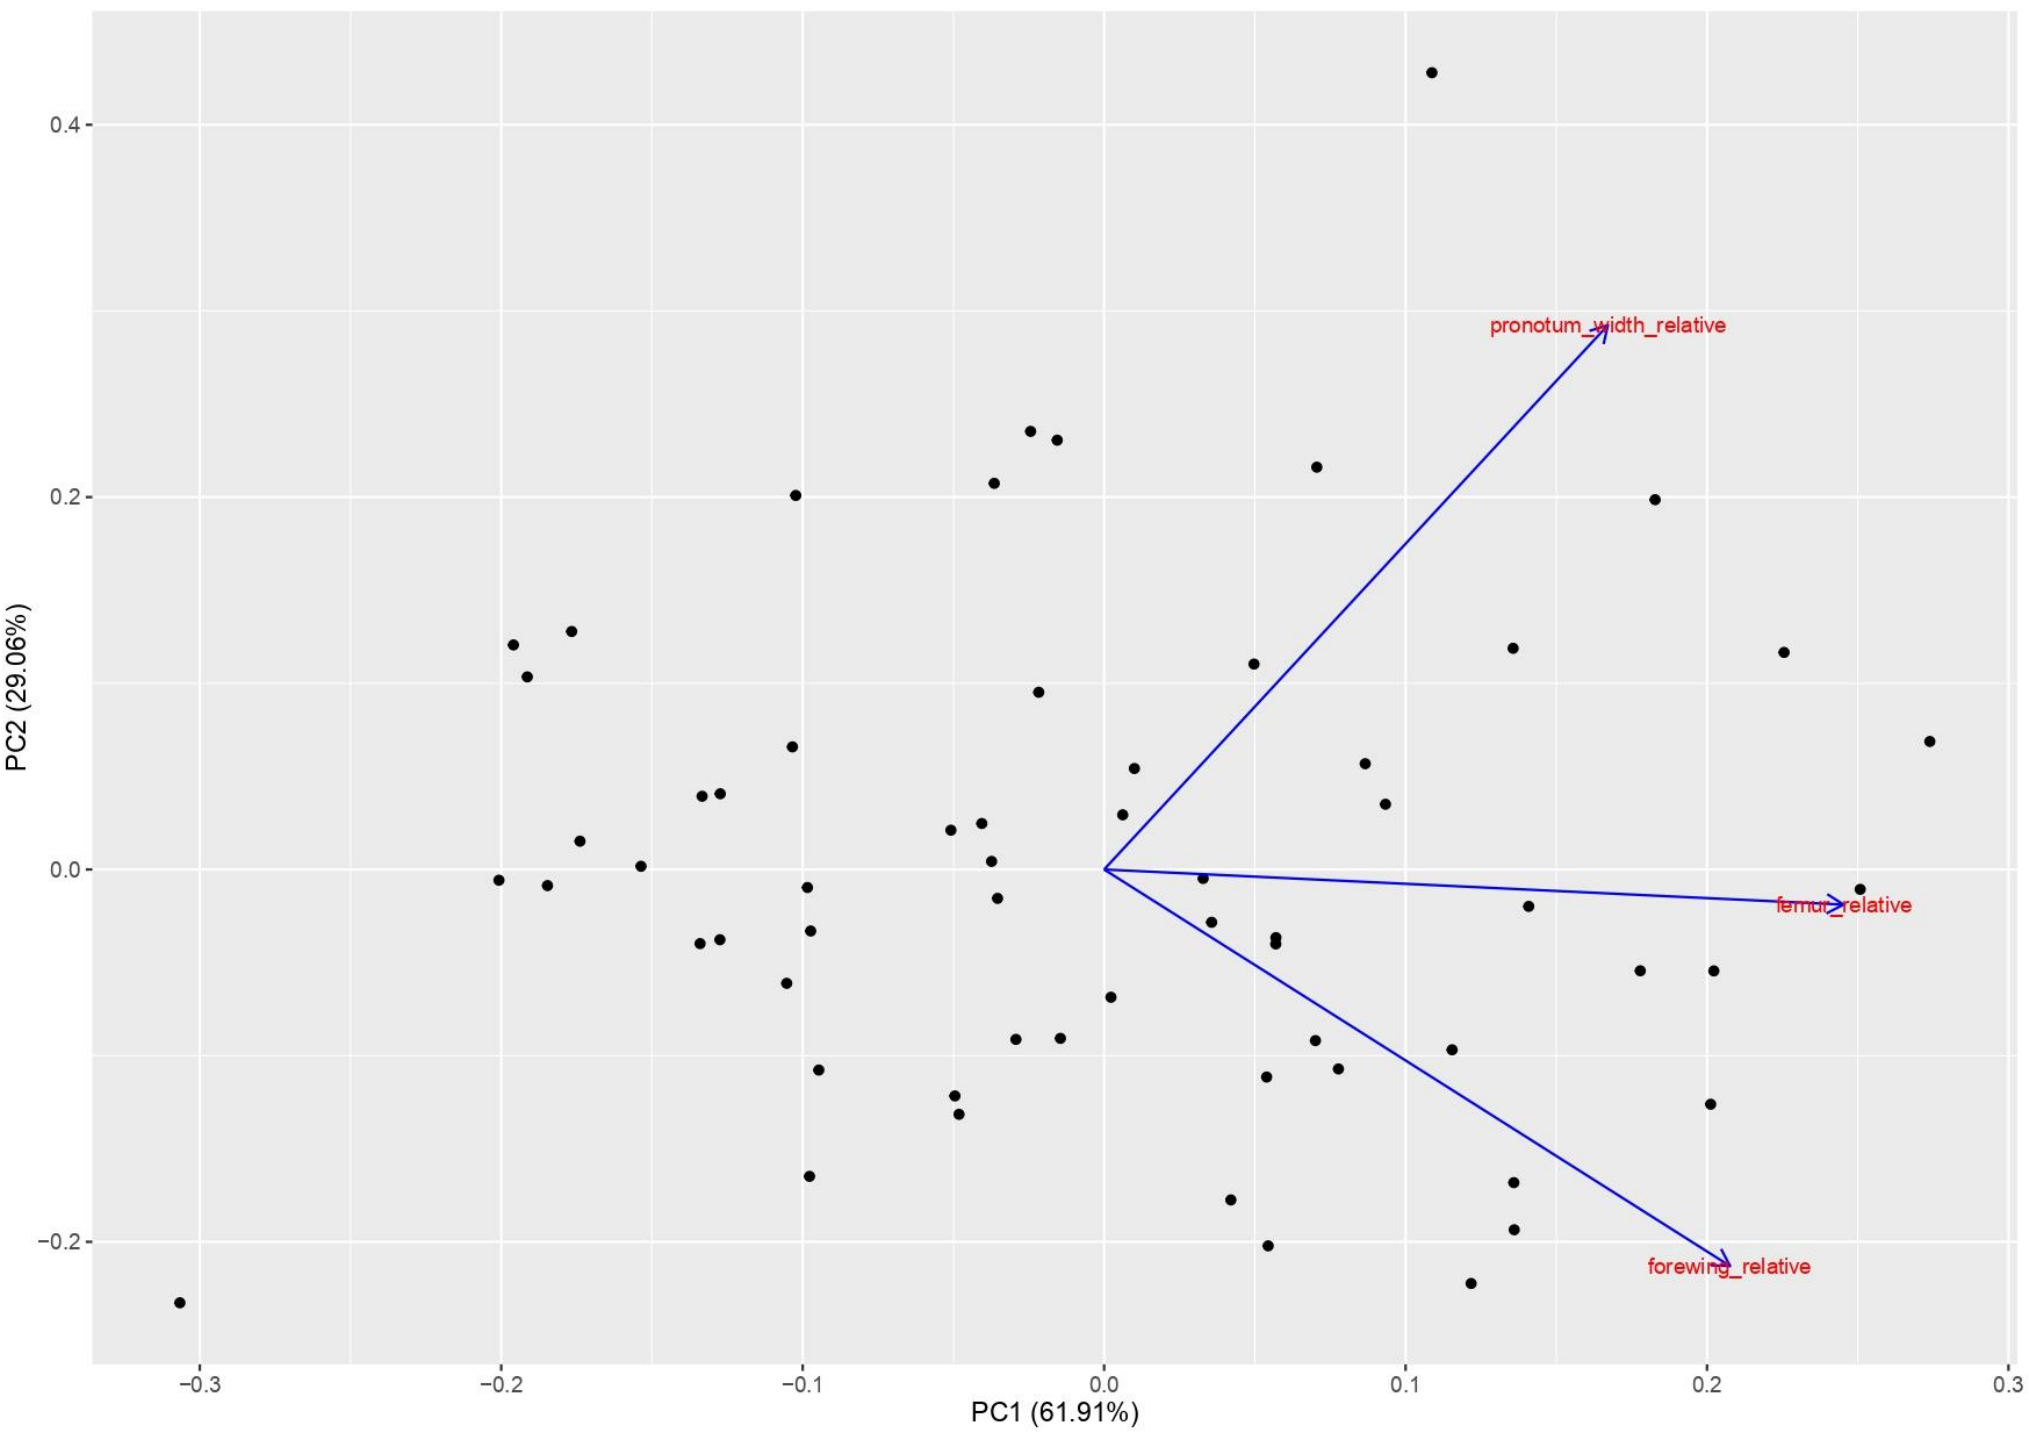

Figure S2  
Grasshoppers  
*Chorthippus parallelus*  
Eigenvalue 0.554

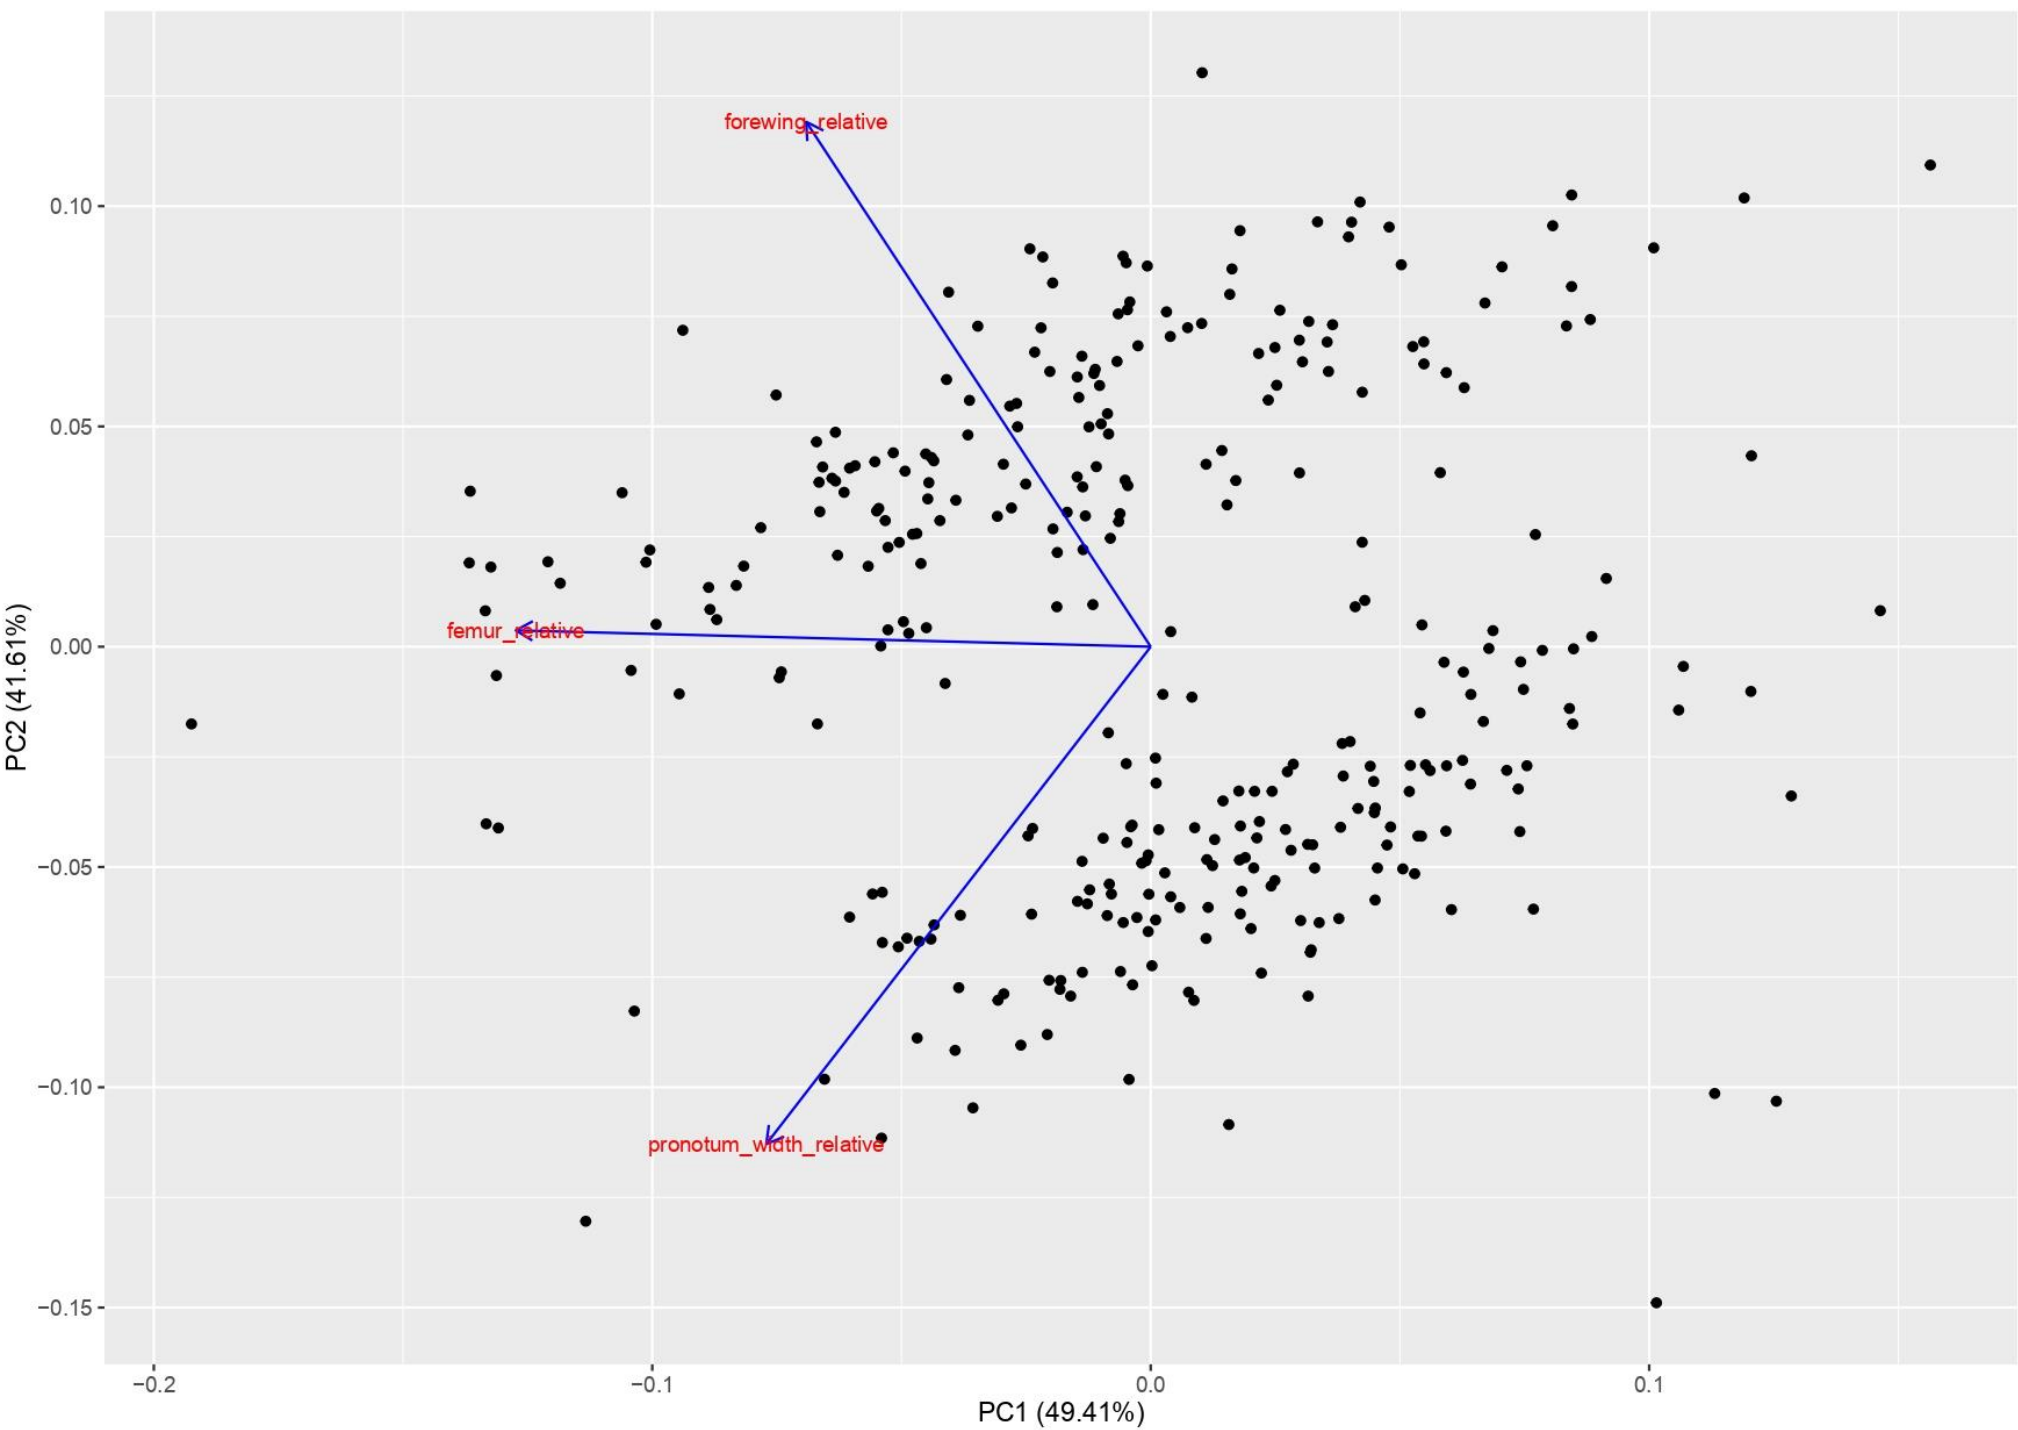

Figure S2  
Grasshoppers  
*Stenobothrus lineatus*  
Eigenvalue 0.087

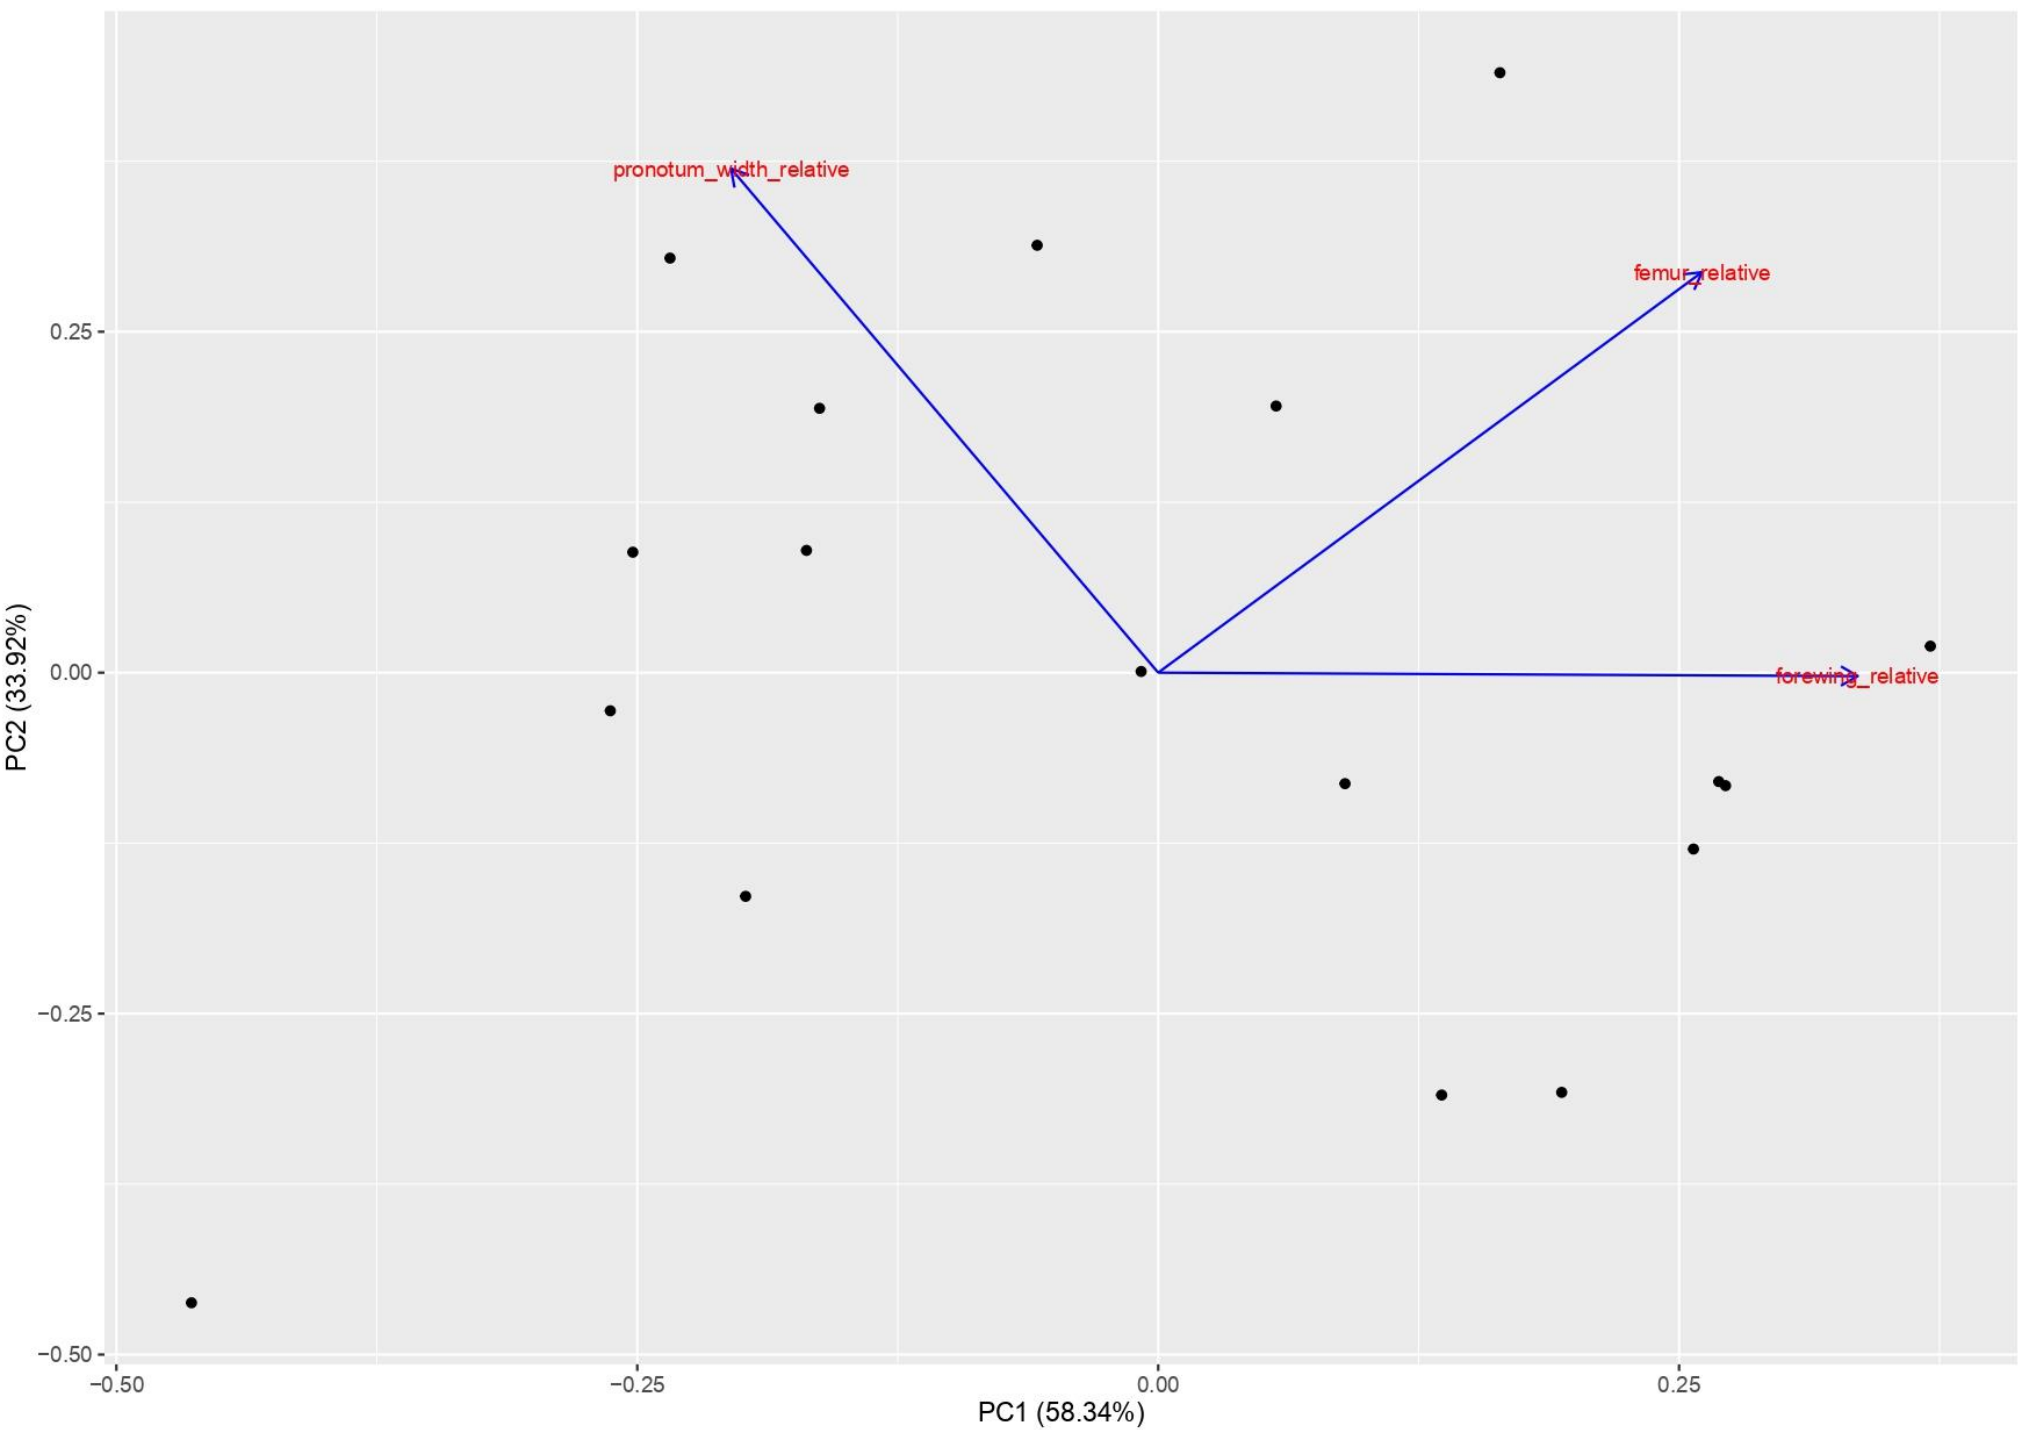

Supplement: Supplementary file 2 [file we-23-35-2023-supplement.zip]
