# Supplementary material for: Little evidence for land-use filters on intraspecific trait variation in three arthropod groups
Source: Copernicus journal article supplement (doi:10.5194/we-23-35-2023), 2023-03-27
Supplement: Supplementary file 1 [file we-23-35-2023-supplement.zip]

**Table S1** Information on used land-use datasets.

| ID                       | source/owner                                                                            | name/content                                                                                                                                                                          | year used                                   |
|--------------------------|-----------------------------------------------------------------------------------------|---------------------------------------------------------------------------------------------------------------------------------------------------------------------------------------|---------------------------------------------|
| 31195                    | Katja Wehner<br>Nico Blüthgen                                                           | Intraspecific morphological traits in Geotrupidae<br><a href="https://www.bexis.uni-jena.de/ddm/data/Showdata/31195">https://www.bexis.uni-jena.de/ddm/data/Showdata/31195</a>        | 2014                                        |
| 31198                    | Katja Wehner<br>Nico Blüthgen                                                           | Intraspecific morphological traits in small dung beetles<br><a href="https://www.bexis.uni-jena.de/ddm/data/Showdata/31198">https://www.bexis.uni-jena.de/ddm/data/Showdata/31198</a> | 2014                                        |
| 31200                    | Katja Wehner<br>Nico Blüthgen                                                           | Intraspecific morphological traits in bee species<br><a href="https://www.bexis.uni-jena.de/ddm/data/Showdata/31200">https://www.bexis.uni-jena.de/ddm/data/Showdata/31200</a>        | 2008, 2012                                  |
| 31202                    | Katja Wehner<br>Nico Blüthgen                                                           | Intraspecific morphological traits in grasshoppers<br><a href="https://www.bexis.uni-jena.de/ddm/data/Showdata/31202">https://www.bexis.uni-jena.de/ddm/data/Showdata/31202</a>       | 2014                                        |
| 19266<br>version 1.15.12 | Katrin Lorenzen<br>Wolfgang Weisser<br>Manfred Ayasse<br>Markus Fischer<br>Juliane Vogt | Input data for LUI calculation tool since 2006<br>Mowing, Grazing, Fertilization                                                                                                      | mean of 2007/08/11/12<br>mean of 2013/14/15 |
| 24646*<br>version 1.2.8  | Peter Schall<br>Christian Ammer<br>Jürgen Bauhus                                        | ForMI dynamics<br>Forest Management Intensity Index Dynamics of all forest EPs                                                                                                        | 2018                                        |

\* Kahl, T. & Bauhus, J. (2014). An index of forest management intensity based on assessment of harvested tree volume, tree species composition and dead wood origin. *Nature Conservation*, 7, 15–27
