# Supplementary material for: Little evidence for land-use filters on intraspecific trait variation in three arthropod groups
Source: Copernicus journal article supplement (doi:10.5194/we-23-35-2023), 2023-03-27
Supplement: Supplementary file 3 [file we-23-35-2023-supplement.zip]

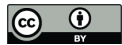

## *Supplement of*

# **Little evidence for land-use filters on intraspecific trait variation in three arthropod groups**

**Katja Wehner et al.**

*Correspondence to:* Katja Wehner ([katja.wehner@tu-darmstadt.de](mailto:katja.wehner@tu-darmstadt.de))

- [we-23-35-2023-supplement-title-page.pdf](#)
- [FS1.pdf](#)
- [FS2.pdf](#)
- [TS1.pdf](#)
- [TS2.pdf](#)

The copyright of individual parts of the supplement might differ from the article licence.
