# Supplementary material for: Little evidence for land-use filters on intraspecific trait variation in three arthropod groups
Source: Copernicus journal article supplement (doi:10.5194/we-23-35-2023), 2023-03-27
Supplement: Supplementary file 4 [file we-23-35-2023-supplement.zip]

**Table S2** Number of individuals of large dung beetle species per plot.

| <b>Plot</b> | <b><i>Anoplotrupes stercorosus</i></b> | <b>Plot</b> | <b><i>Trypocopris vernalis</i></b> | <b>Plot</b> | <b><i>Typhaeus typhoeus</i></b> |
|-------------|----------------------------------------|-------------|------------------------------------|-------------|---------------------------------|
| AEG27       | 2                                      | AEG27       | 1                                  | SEW6        | 1                               |
| AEG28       | 10                                     | AEG28       | 10                                 | SEW35       | 1                               |
| AEG32       | 1                                      | AEG32       | 1                                  | SEW15       | 1                               |
| AEG34       | 1                                      | AEG34       | 1                                  | SEW6        | 5                               |
| AEG5        | 1                                      | AEG8        | 6                                  | SEW1        | 4                               |
| AEG8        | 6                                      | HEG21       | 2                                  | SEW4        | 1                               |
| AEW1        | 20                                     | SEG1        | 2                                  | SEW5        | 1                               |
| AEW10       | 10                                     | SEG25/2     | 5                                  | SEW3        | 4                               |
| AEW11       | 9                                      | SEG31       | 2                                  | SEW9        | 2                               |
| AEW12       | 4                                      | SEG38       | 1                                  | SEW4        | 3                               |
| AEW13       | 1                                      | SEG42       | 1                                  |             |                                 |
| AEW14       | 10                                     | SEG43       | 2                                  |             |                                 |
| AEW17       | 4                                      | SEGX1       | 3                                  |             |                                 |
| AEW18       | 10                                     | SEW1        | 16                                 |             |                                 |
| AEW19       | 5                                      | SEW12       | 3                                  |             |                                 |
| AEW2        | 20                                     | SEW13       | 5                                  |             |                                 |
| AEW20       | 5                                      | SEW14       | 10                                 |             |                                 |
| AEW22       | 4                                      | SEW15       | 10                                 |             |                                 |
| AEW23       | 1                                      | SEW16       | 2                                  |             |                                 |
| AEW24       | 6                                      | SEW17       | 1                                  |             |                                 |
| AEW25       | 3                                      | SEW18       | 10                                 |             |                                 |
| AEW26       | 2                                      | SEW19       | 4                                  |             |                                 |
| AEW27       | 6                                      | SEW2        | 27                                 |             |                                 |
| AEW28       | 10                                     | SEW20       | 8                                  |             |                                 |
| AEW29       | 10                                     | SEW21       | 10                                 |             |                                 |
| AEW3        | 20                                     | SEW22       | 2                                  |             |                                 |
| AEW30       | 6                                      | SEW23       | 8                                  |             |                                 |
| AEW31       | 8                                      | SEW25       | 3                                  |             |                                 |
| AEW32       | 2                                      | SEW26       | 1                                  |             |                                 |
| AEW33       | 10                                     | SEW28       | 10                                 |             |                                 |
| AEW34       | 10                                     | SEW29       | 3                                  |             |                                 |
| AEW35       | 10                                     | SEW3        | 20                                 |             |                                 |
| AEW37       | 1                                      | SEW30       | 2                                  |             |                                 |
| AEW4        | 14                                     | SEW31       | 8                                  |             |                                 |
| AEW40       | 6                                      | SEW32       | 10                                 |             |                                 |
| AEW42       | 1                                      | SEW33       | 2                                  |             |                                 |
| AEW43       | 5                                      | SEW34       | 2                                  |             |                                 |
| AEW44       | 1                                      | SEW35       | 2                                  |             |                                 |
| AEW45       | 8                                      | SEW36       | 3                                  |             |                                 |
| AEW46       | 10                                     | SEW37       | 1                                  |             |                                 |
| AEW47       | 8                                      | SEW38       | 8                                  |             |                                 |
| AEW48       | 10                                     | SEW4        | 3                                  |             |                                 |
| AEW5        | 10                                     | SEW40       | 1                                  |             |                                 |
| AEW50       | 3                                      | SEW41       | 3                                  |             |                                 |
| AEW6        | 13                                     | SEW42       | 5                                  |             |                                 |
| AEW7        | 10                                     | SEW45       | 3                                  |             |                                 |
| AEW8        | 10                                     | SEW48       | 3                                  |             |                                 |
| AEW9        | 11                                     | SEW49       | 7                                  |             |                                 |
| HEG21       | 2                                      | SEW5        | 1                                  |             |                                 |
| HEW1        | 20                                     | SEW6        | 2                                  |             |                                 |
| HEW10       | 15                                     | SEW7        | 2                                  |             |                                 |

|         |    |      |    |
|---------|----|------|----|
| HEW11   | 14 | SEW8 | 7  |
| HEW12   | 20 | SEW9 | 20 |
| HEW15   | 10 |      |    |
| HEW16   | 10 |      |    |
| HEW17   | 10 |      |    |
| HEW18   | 10 |      |    |
| HEW19   | 10 |      |    |
| HEW21   | 10 |      |    |
| HEW22   | 10 |      |    |
| HEW23   | 3  |      |    |
| HEW24   | 10 |      |    |
| HEW25   | 4  |      |    |
| HEW26   | 5  |      |    |
| HEW27   | 10 |      |    |
| HEW28   | 4  |      |    |
| HEW29   | 3  |      |    |
| HEW3    | 20 |      |    |
| HEW30   | 2  |      |    |
| HEW31   | 10 |      |    |
| HEW32   | 10 |      |    |
| HEW33   | 2  |      |    |
| HEW35   | 10 |      |    |
| HEW36   | 10 |      |    |
| HEW38   | 3  |      |    |
| HEW39   | 5  |      |    |
| HEW4    | 16 |      |    |
| HEW40   | 10 |      |    |
| HEW41   | 10 |      |    |
| HEW42   | 1  |      |    |
| HEW43   | 4  |      |    |
| HEW44   | 2  |      |    |
| HEW45   | 1  |      |    |
| HEW46   | 11 |      |    |
| HEW47   | 1  |      |    |
| HEW48   | 4  |      |    |
| HEW49   | 4  |      |    |
| HEW5    | 20 |      |    |
| HEW50   | 11 |      |    |
| HEW51   | 1  |      |    |
| HEW6    | 20 |      |    |
| HEW7    | 10 |      |    |
| HEW8    | 1  |      |    |
| HEW9    | 10 |      |    |
| SEG1    | 1  |      |    |
| SEG25/2 | 5  |      |    |
| SEG31   | 1  |      |    |

|       |    |
|-------|----|
| SEG37 | 1  |
| SEG38 | 1  |
| SEG42 | 1  |
| SEG43 | 2  |
| SEG44 | 1  |
| SEGX1 | 4  |
| SEW1  | 90 |
| SEW10 | 10 |
| SEW11 | 10 |
| SEW12 | 13 |
| SEW13 | 15 |
| SEW14 | 20 |
| SEW15 | 21 |
| SEW16 | 12 |
| SEW17 | 11 |
| SEW18 | 20 |
| SEW19 | 14 |
| SEW2  | 61 |
| SEW20 | 18 |
| SEW21 | 20 |
| SEW22 | 12 |
| SEW23 | 18 |
| SEW25 | 13 |
| SEW26 | 11 |
| SEW28 | 20 |
| SEW29 | 13 |
| SEW3  | 84 |
| SEW30 | 12 |
| SEW31 | 18 |
| SEW32 | 20 |
| SEW33 | 12 |
| SEW34 | 12 |
| SEW35 | 13 |
| SEW36 | 13 |
| SEW37 | 11 |
| SEW38 | 18 |
| SEW39 | 10 |
| SEW4  | 67 |
| SEW40 | 11 |
| SEW41 | 13 |
| SEW42 | 15 |
| SEW43 | 10 |
| SEW44 | 10 |
| SEW45 | 13 |
| SEW46 | 6  |
| SEW47 | 10 |
| SEW48 | 13 |
| SEW49 | 17 |
| SEW5  | 72 |
| SEW50 | 10 |
| SEW6  | 45 |
| SEW7  | 62 |
| SEW8  | 67 |
| SEW9  | 91 |

**Table S2** Number of individuals of small dung beetle species per plot.

| Plot  | <i>Aphodius ater</i> | Plot  | <i>Aphodius depressus</i> | Plot  | <i>Onthophagus fracticornis</i> | Plot  | <i>Onthophagus similis</i> |
|-------|----------------------|-------|---------------------------|-------|---------------------------------|-------|----------------------------|
| HEG1  | 3                    | AEG3  | 1                         | AEG1  | 3                               | AEG16 | 1                          |
| HEG2  | 3                    | AEG41 | 1                         | AEG16 | 1                               | AEG3  | 2                          |
| HEG3  | 2                    | AEG8  | 3                         | AEG17 | 1                               | AEG30 | 2                          |
| HEG5  | 2                    | AEG9  | 2                         | AEG2  | 7                               | AEG38 | 1                          |
| HEG6  | 1                    | AEW17 | 2                         | AEG25 | 1                               | AEG5  | 2                          |
| HEG9  | 4                    | AEW2  | 3                         | AEG26 | 1                               | AEG50 | 1                          |
| HEW11 | 3                    | AEW23 | 1                         | AEG27 | 1                               | AEG6  | 1                          |
| HEW12 | 1                    | AEW3  | 2                         | AEG28 | 3                               | AEW34 | 1                          |
| HEW3  | 1                    | AEW30 | 1                         | AEG3  | 7                               | AEW4  | 1                          |
| HEW5  | 3                    | AEW34 | 2                         | AEG30 | 2                               | AEW8  | 1                          |
| HEW6  | 2                    | AEW4  | 5                         | AEG32 | 2                               | HEG1  | 1                          |
| SEG6  | 3                    | AEW46 | 3                         | AEG38 | 1                               | HEG2  | 1                          |
| SEG9  | 2                    | AEW47 | 1                         | AEG4  | 1                               | SEG33 | 1                          |
| SEW1  | 1                    | AEW5  | 4                         | AEG41 | 3                               | SEG6  | 4                          |
| SEW2  | 3                    | AEW6  | 3                         | AEG44 | 2                               | SEG9  | 2                          |
| SEW6  | 3                    | AEW7  | 3                         | AEG5  | 2                               | SEGX  | 1                          |
| SEW7  | 2                    | AEW8  | 3                         | AEG50 | 1                               | SEW14 | 1                          |
|       |                      | AEW9  | 4                         | AEG6  | 1                               | SEW2  | 1                          |
|       |                      | HEG2  | 3                         | AEG8  | 2                               | SEW6  | 1                          |
|       |                      | HEG3  | 1                         | AEW2  | 1                               |       |                            |
|       |                      | HEW1  | 2                         | AEW3  | 1                               |       |                            |
|       |                      | HEW10 | 2                         | AEW4  | 3                               |       |                            |
|       |                      | HEW11 | 7                         | AEW6  | 3                               |       |                            |
|       |                      | HEW12 | 3                         | AEW8  | 1                               |       |                            |
|       |                      | HEW28 | 1                         | AEW9  | 1                               |       |                            |
|       |                      | HEW29 | 1                         | HEG1  | 1                               |       |                            |
|       |                      | HEW3  | 4                         | HEG2  | 3                               |       |                            |
|       |                      | HEW30 | 1                         | HEG8  | 1                               |       |                            |
|       |                      | HEW33 | 1                         | SEG40 | 1                               |       |                            |
|       |                      | HEW35 | 3                         | SEG47 | 1                               |       |                            |
|       |                      | HEW37 | 3                         | SEG6  | 3                               |       |                            |
|       |                      | HEW39 | 1                         | SEG9  | 2                               |       |                            |
|       |                      | HEW4  | 1                         | SEW1  | 3                               |       |                            |
|       |                      | HEW48 | 1                         | SEW2  | 5                               |       |                            |
|       |                      | HEW5  | 5                         | SEW4  | 4                               |       |                            |
|       |                      | HEW50 | 1                         | SEW5  | 2                               |       |                            |
|       |                      | HEW6  | 4                         | SEW6  | 3                               |       |                            |
|       |                      | SEG9  | 2                         |       |                                 |       |                            |
|       |                      | SEW28 | 1                         |       |                                 |       |                            |
|       |                      | SEW38 | 1                         |       |                                 |       |                            |
|       |                      | SEW5  | 4                         |       |                                 |       |                            |
|       |                      | SEW6  | 2                         |       |                                 |       |                            |
|       |                      | SEW7  | 3                         |       |                                 |       |                            |
|       |                      | SEW9  | 3                         |       |                                 |       |                            |

**Table S2** Number of individuals of bee species per plot.

| <b>Plot</b> | <b><i>Bombus lapidarius</i></b> | <b>Plot</b> | <b><i>Bombus sylvarum</i></b> | <b>Plot</b> | <b><i>Lasioglossus calceatum</i></b> |
|-------------|---------------------------------|-------------|-------------------------------|-------------|--------------------------------------|
| AEG10       | 2                               | AEG10       | 1                             | AEG10       | 2                                    |
| AEG15       | 2                               | AEG15       | 1                             | AEG17       | 3                                    |
| AEG17       | 3                               | AEG17       | 3                             | AEG2        | 1                                    |
| AEG2        | 2                               | AEG22       | 3                             | AEG22       | 3                                    |
| AEG25       | 3                               | AEG25       | 3                             | AEG25       | 1                                    |
| AEG26       | 3                               | AEG26       | 2                             | AEG26       | 3                                    |
| AEG27       | 1                               | AEG27       | 3                             | AEG28       | 3                                    |
| AEG28       | 3                               | AEG3        | 2                             | AEG29       | 1                                    |
| AEG3        | 3                               | AEG33       | 2                             | AEG31       | 1                                    |
| AEG32       | 1                               | AEG34       | 2                             | AEG32       | 1                                    |
| AEG33       | 3                               | AEG43       | 3                             | AEG33       | 3                                    |
| AEG34       | 3                               | AEG46       | 2                             | AEG42       | 1                                    |
| AEG40       | 1                               | AEG48       | 3                             | AEG43       | 1                                    |
| AEG42       | 2                               | AEG6        | 3                             | AEG48       | 3                                    |
| AEG43       | 1                               | AEG8        | 3                             | AEG49       | 1                                    |
| AEG46       | 3                               | AEG9        | 3                             | AEG6        | 2                                    |
| AEG48       | 2                               | HEG17       | 3                             | AEG7        | 2                                    |
| AEG5        | 2                               | HEG18       | 3                             | AEG8        | 1                                    |
| AEG9        | 3                               | HEG2        | 3                             | AEG9        | 3                                    |
| HEG11       | 1                               | HEG21       | 1                             | HEG1        | 1                                    |
| HEG16       | 1                               | HEG29       | 3                             | HEG16       | 1                                    |
| HEG17       | 1                               | HEG41       | 1                             | HEG17       | 1                                    |
| HEG20       | 1                               | HEG43       | 3                             | HEG2        | 3                                    |
| HEG24       | 2                               | HEG6        | 1                             | HEG20       | 3                                    |
| HEG29       | 3                               | HEG7        | 1                             | HEG26       | 2                                    |
| HEG31       | 1                               | SEG10       | 3                             | HEG29       | 2                                    |
| HEG38       | 3                               | SEG11       | 3                             | HEG31       | 3                                    |
| HEG40       | 2                               | SEG25       | 1                             | HEG38       | 1                                    |
| HEG41       | 3                               | SEG28       | 2                             | HEG40       | 1                                    |
| HEG43       | 1                               | SEG3        | 3                             | HEG41       | 1                                    |
| HEG47       | 1                               | SEG31       | 3                             | HEG48       | 2                                    |
| HEG7        | 1                               | SEG37       | 1                             | HEG6        | 2                                    |
| HEG9        | 2                               | SEG39       | 2                             | HEG7        | 1                                    |
| SEG10       | 2                               | SEG40       | 1                             | HEG8        | 3                                    |
| SEG11       | 1                               | SEG46       | 1                             | SEG10       | 2                                    |
| SEG17       | 2                               |             |                               | SEG17       | 1                                    |
| SEG25       | 3                               |             |                               | SEG2        | 1                                    |
| SEG3        | 1                               |             |                               | SEG26       | 2                                    |
| SEG31       | 3                               |             |                               | SEG33       | 2                                    |
| SEG35       | 1                               |             |                               | SEG35       | 1                                    |
| SEG36       | 2                               |             |                               | SEG38       | 3                                    |
| SEG37       | 3                               |             |                               | SEG49       | 3                                    |
| SEG38       | 1                               |             |                               | SEG6        | 2                                    |
| SEG39       | 2                               |             |                               | SEG8        | 3                                    |
| SEG40       | 3                               |             |                               | SEG9        | 1                                    |
| SEG41       | 1                               |             |                               |             |                                      |
| SEG42       | 1                               |             |                               |             |                                      |
| SEG43       | 1                               |             |                               |             |                                      |
| SEG48       | 3                               |             |                               |             |                                      |
| SEG49       | 1                               |             |                               |             |                                      |

**Table S2** Number of individuals of grasshopper species per plot.

| <b>Plot</b> | <b><i>Chorthippus biguttulus</i></b> | <b>Plot</b> | <b><i>Chorthippus parallelus</i></b> | <b>Plot</b> | <b><i>Stenobothrus lineatus</i></b> |
|-------------|--------------------------------------|-------------|--------------------------------------|-------------|-------------------------------------|
| AEG12       | 2                                    | AEG1        | 2                                    | AEG7        | 3                                   |
| AEG13       | 9                                    | AEG10       | 5                                    | AEG9        | 1                                   |
| AEG14       | 1                                    | AEG11       | 13                                   | AEG10       | 1                                   |
| AEG2        | 2                                    | AEG12       | 1                                    | AEG25       | 2                                   |
| AEG25       | 2                                    | AEG13       | 15                                   | AEG26       | 4                                   |
| AEG27       | 2                                    | AEG14       | 6                                    | AEG27       | 6                                   |
| AEG3        | 1                                    | AEG15       | 24                                   | AEG48       | 3                                   |
| AEG30       | 2                                    | AEG17       | 19                                   |             |                                     |
| AEG35       | 2                                    | AEG19       | 6                                    |             |                                     |
| AEG38       | 6                                    | AEG20       | 6                                    |             |                                     |
| AEG47       | 5                                    | AEG21       | 5                                    |             |                                     |
| AEG48       | 3                                    | AEG22       | 9                                    |             |                                     |
| AEG5        | 1                                    | AEG23       | 23                                   |             |                                     |
| AEG50       | 1                                    | AEG24       | 1                                    |             |                                     |
| AEG6        | 3                                    | AEG25       | 2                                    |             |                                     |
| AEG7        | 5                                    | AEG27       | 6                                    |             |                                     |
| HEG1        | 1                                    | AEG28       | 10                                   |             |                                     |
| HEG2        | 1                                    | AEG29       | 2                                    |             |                                     |
| HEG24       | 5                                    | AEG3        | 22                                   |             |                                     |
| HEG3        | 4                                    | AEG30       | 5                                    |             |                                     |
| HEG30       | 2                                    | AEG31       | 2                                    |             |                                     |
| HEG41       | 2                                    | AEG32       | 6                                    |             |                                     |
| HEG47       | 1                                    | AEG33       | 11                                   |             |                                     |
| HEG48       | 2                                    | AEG35       | 10                                   |             |                                     |
|             |                                      | AEG36       | 10                                   |             |                                     |
|             |                                      | AEG37       | 5                                    |             |                                     |
|             |                                      | AEG38       | 21                                   |             |                                     |
|             |                                      | AEG39       | 2                                    |             |                                     |
|             |                                      | AEG40       | 7                                    |             |                                     |
|             |                                      | AEG41       | 7                                    |             |                                     |
|             |                                      | AEG42       | 2                                    |             |                                     |
|             |                                      | AEG43       | 5                                    |             |                                     |
|             |                                      | AEG44       | 5                                    |             |                                     |
|             |                                      | AEG45       | 2                                    |             |                                     |
|             |                                      | AEG46       | 16                                   |             |                                     |
|             |                                      | AEG49       | 8                                    |             |                                     |
|             |                                      | AEG5        | 8                                    |             |                                     |
|             |                                      | AEG50       | 5                                    |             |                                     |
|             |                                      | AEG6        | 7                                    |             |                                     |
|             |                                      | AEG8        | 11                                   |             |                                     |
|             |                                      | AEG9        | 2                                    |             |                                     |
|             |                                      | HEG1        | 1                                    |             |                                     |
|             |                                      | HEG18       | 2                                    |             |                                     |
|             |                                      | HEG2        | 1                                    |             |                                     |
|             |                                      | HEG20       | 1                                    |             |                                     |
|             |                                      | HEG22       | 2                                    |             |                                     |
|             |                                      | HEG24       | 1                                    |             |                                     |
|             |                                      | HEG29       | 5                                    |             |                                     |
|             |                                      | HEG39       | 3                                    |             |                                     |
|             |                                      | HEG40       | 2                                    |             |                                     |
|             |                                      | HEG41       | 3                                    |             |                                     |
|             |                                      | HEG42       | 2                                    |             |                                     |
|             |                                      | HEG47       | 7                                    |             |                                     |
|             |                                      | HEG48       | 7                                    |             |                                     |
