# Supplementary material for: Little evidence for land-use filters on intraspecific trait variation in three arthropod groups
Source: Copernicus journal article supplement (doi:10.5194/we-23-35-2023), 2023-03-27

*Anoplotrupes stercorosus*

Figure S1  
Korrelation between the  
coefficient of variation (CV)  
per plot and the number of  
individuals per plot in large  
dung beetles

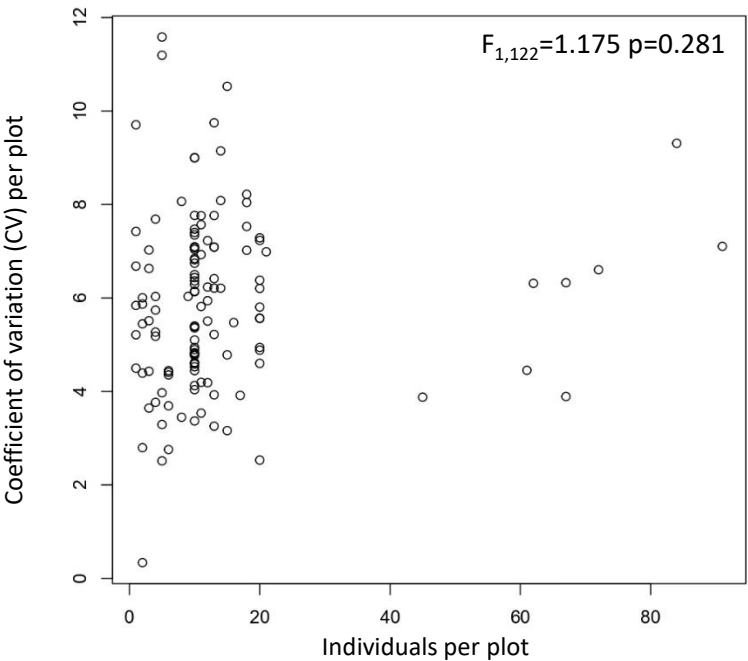

*Trypocopris vernalis*

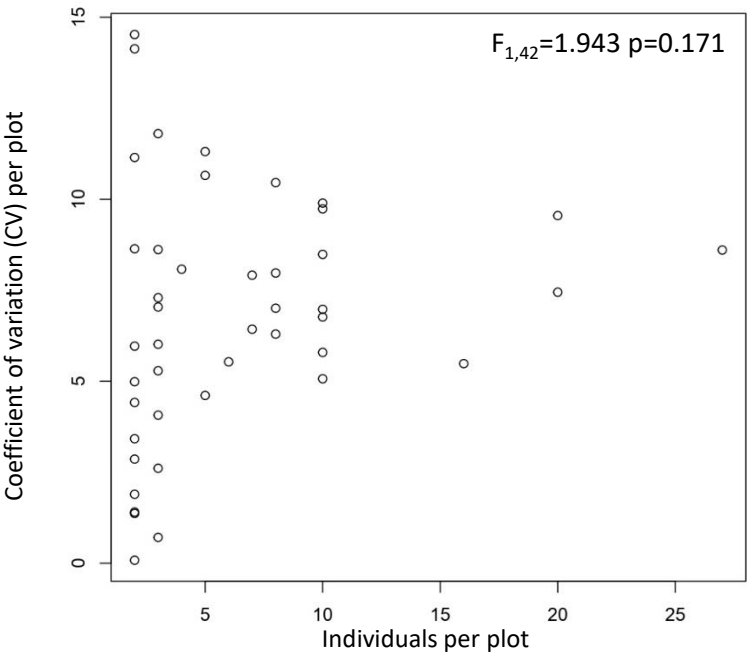

*Typhaeus typhoeus*

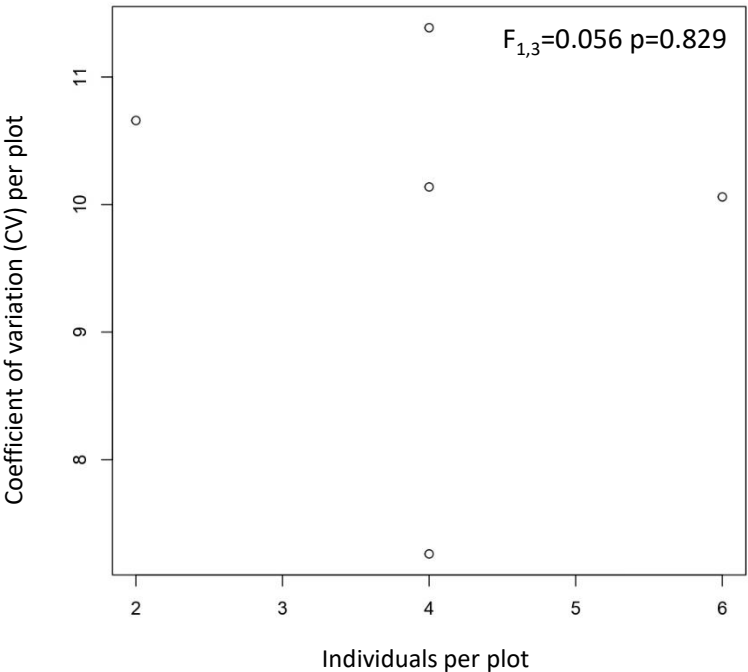

Figure S1  
Korrelation between the coefficient of variation (CV) per plot and the number of individuals per plot in small dung beetles

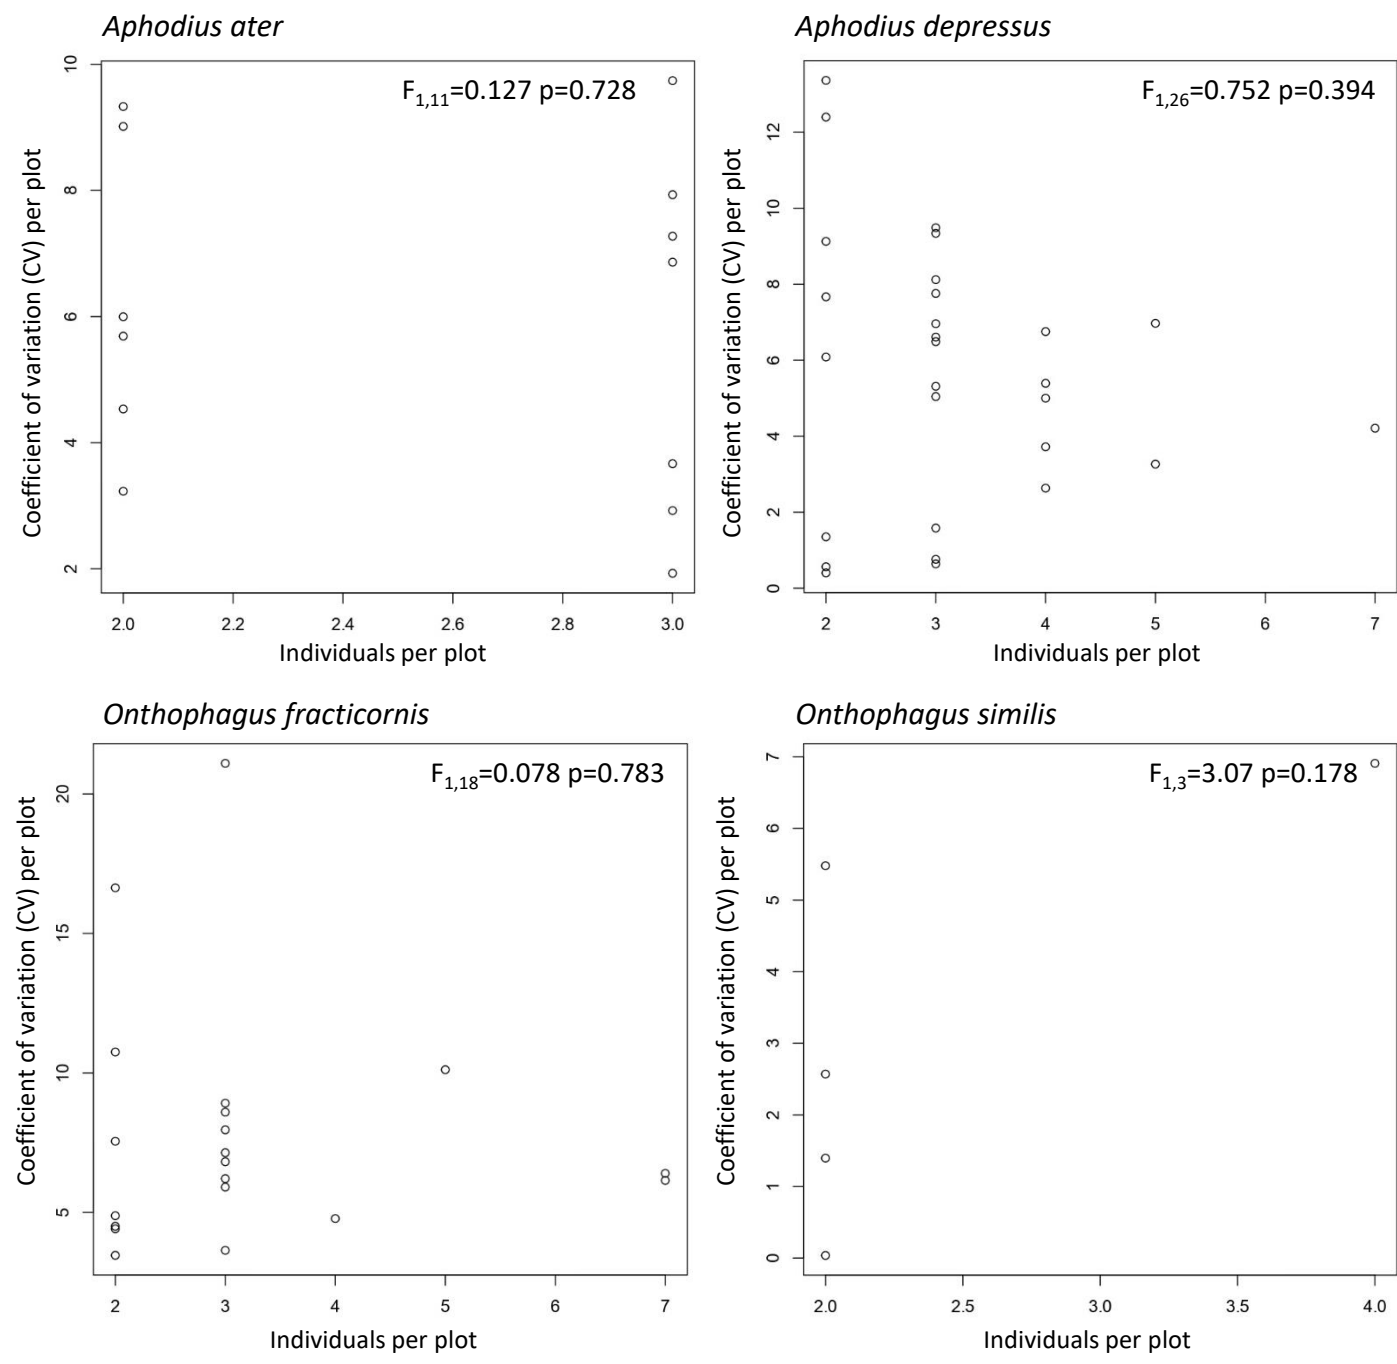

*Bombus lapidarius*

Figure S1  
Korrelation between the  
coefficient of variation (CV)  
per plot and the number of  
individuals per plot in bees

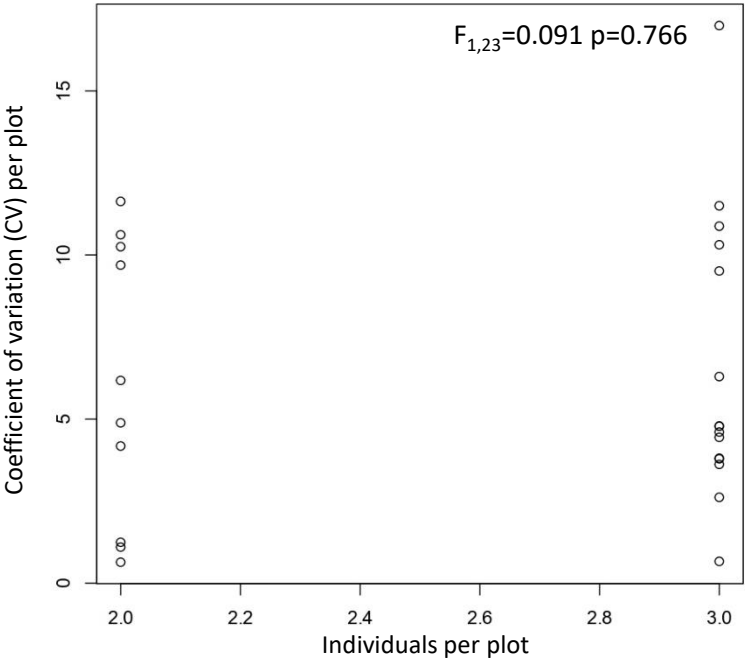

*Bombus sylvarum*

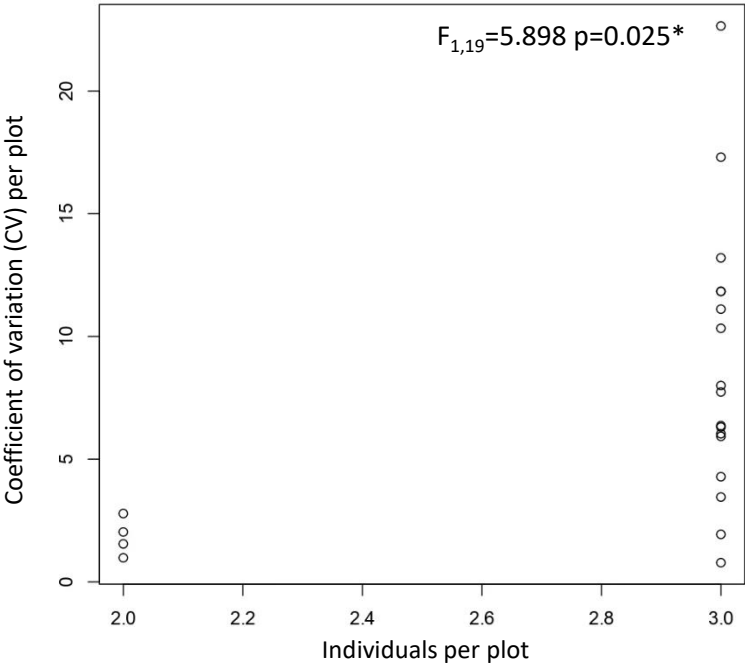

*Lasioglossus calceatum*

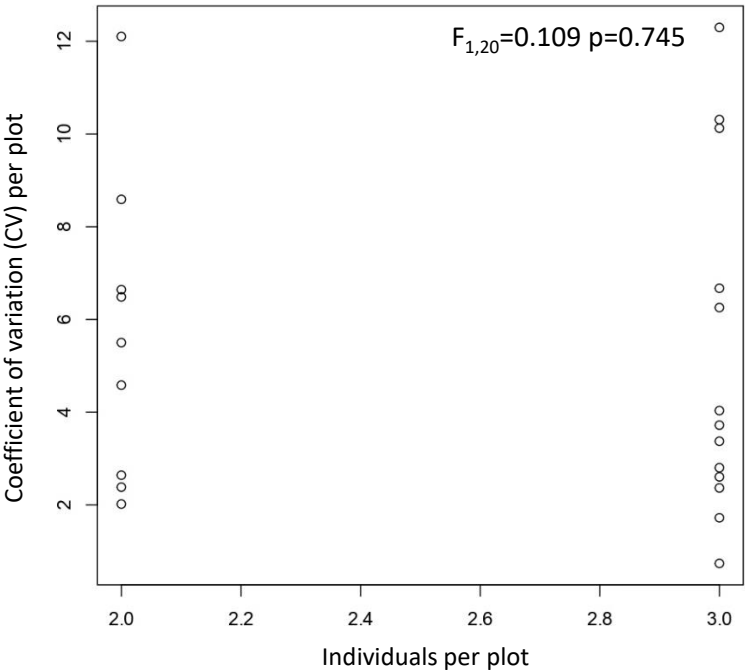

*Chorthippus biguttulus*

Figure S1  
Korrelation between the  
coefficient of variation (CV)  
per plot and the number of  
individuals per plot in  
grasshoppers

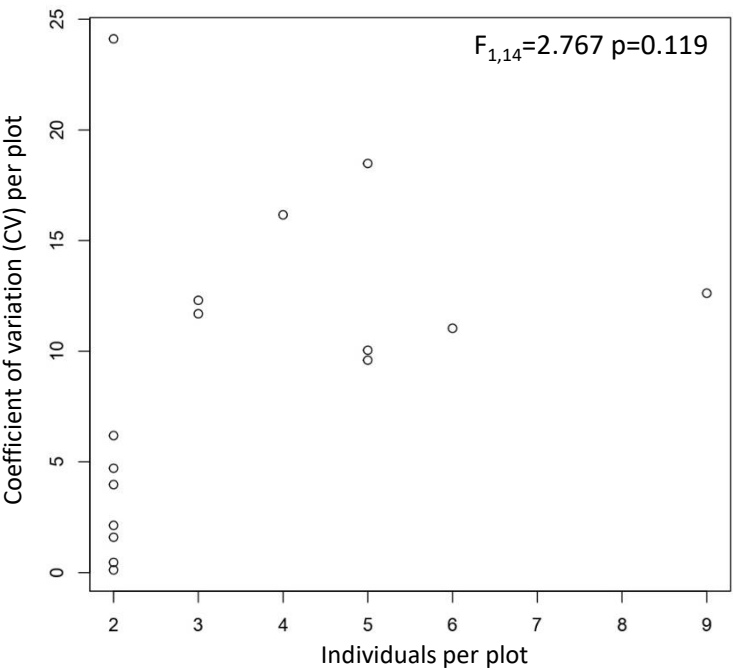

*Chorthippus paralellus*

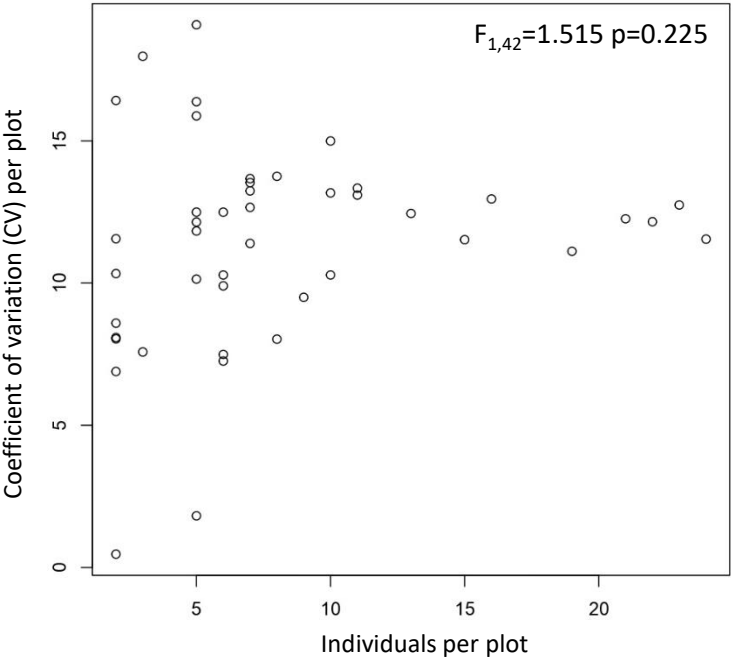

*Stenobothrus lineatus*

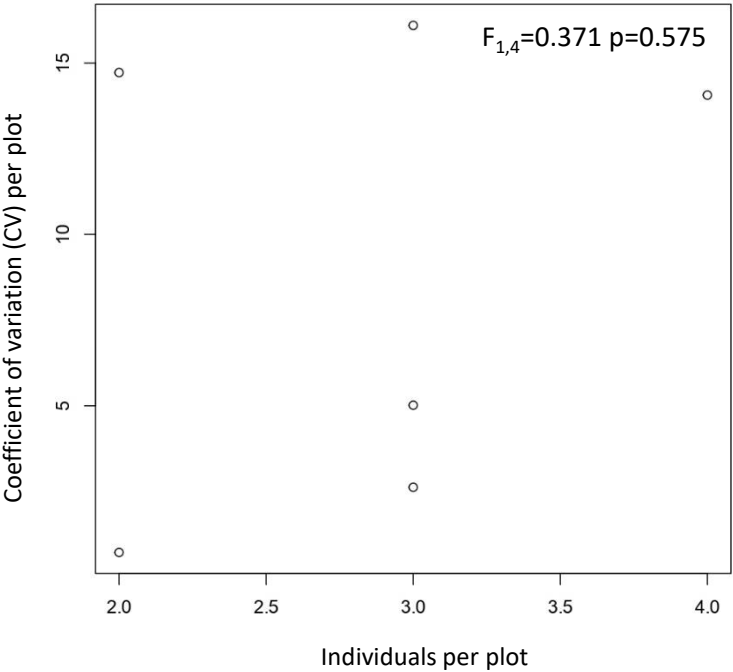

Supplement: Supplementary file 5 [file we-23-35-2023-supplement.zip]
